# Supplementary material
Source: HighWire-hosted journal article supplement (http://molpharm.aspetjournals.org/highwire/filestream/77542/field_highwire_adjunct_files/0/Supplemental_105056_Final.pdf)
Supplement: Supplemental_105056_Final.pdf [file Supplemental_105056_Final.pdf]

Lack of Influence of Substrate on Ligand Interaction with the Human Multidrug And Toxin Extruder,  
MATE1

Authors:

Lucy J Martínez-Guerrero, Mark Morales, Sean Ekins and Stephen H Wright

Supplemental Figures and Tables

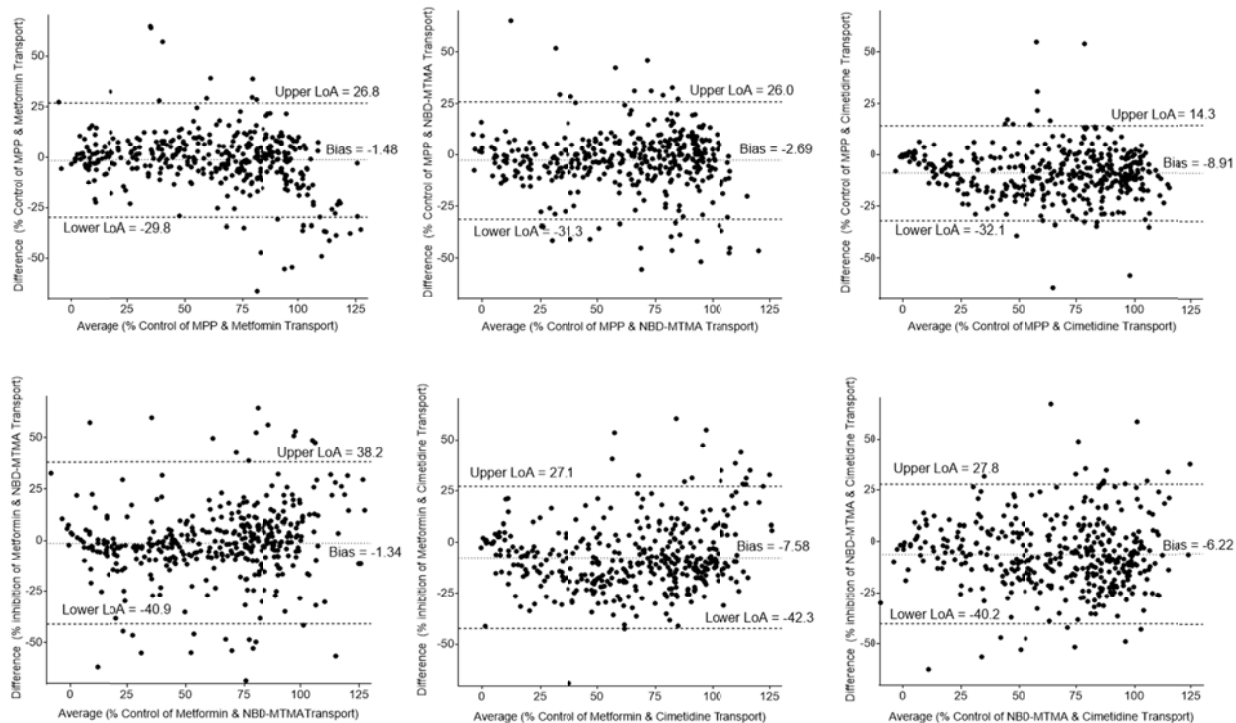

Supplemental Figure 1. Bland-Altman plots for the pair-wise comparisons of the inhibition of MATE1-mediated transport of MPP, NBD-MTMA, cimetidine and metformin produced by 50  $\mu$ M concentrations of the 400 test compounds from the NCC. *Average* of the % of control uptake of two test substrates measured for each test inhibitor is plotted against the *Difference* between these measured uptakes. The dotted lines indicate calculated bias (in no case did calculated bias differ significantly from 0 on the basis of a 1-sample t-test); dashed lines indicate 95% upper and lower limits of agreement (LoA).

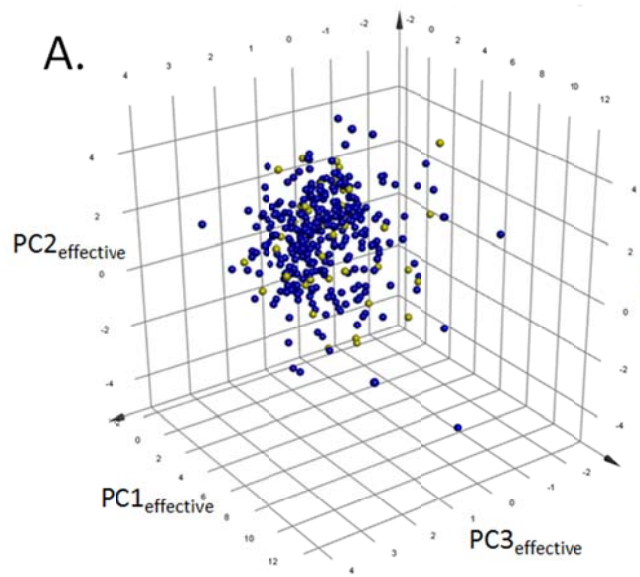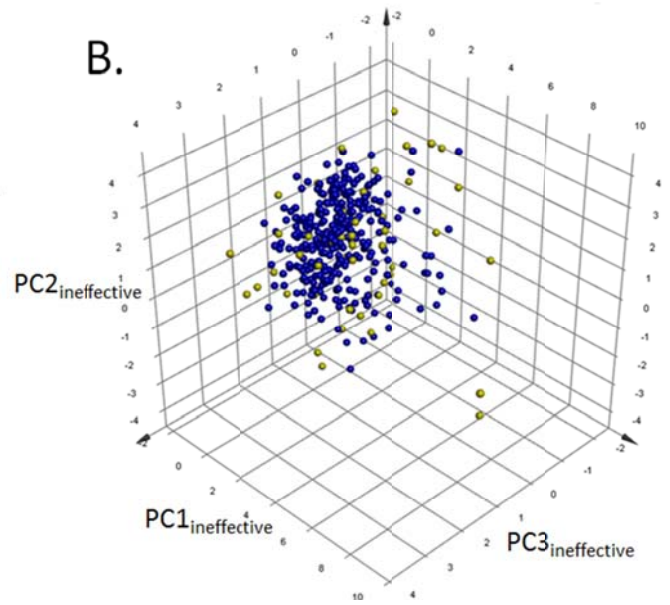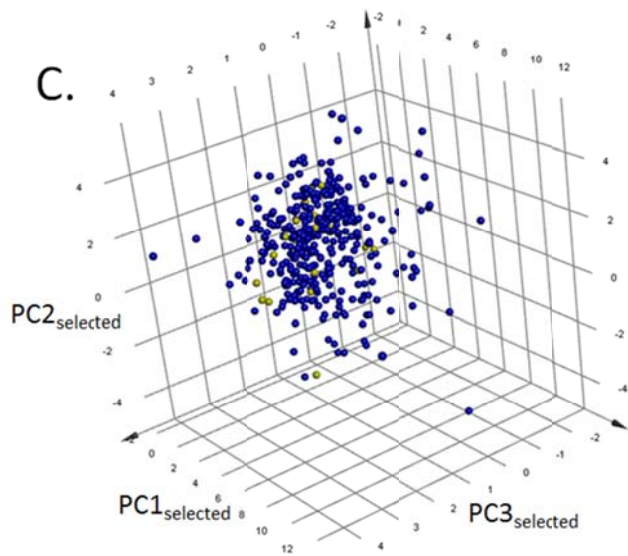

d

of

1

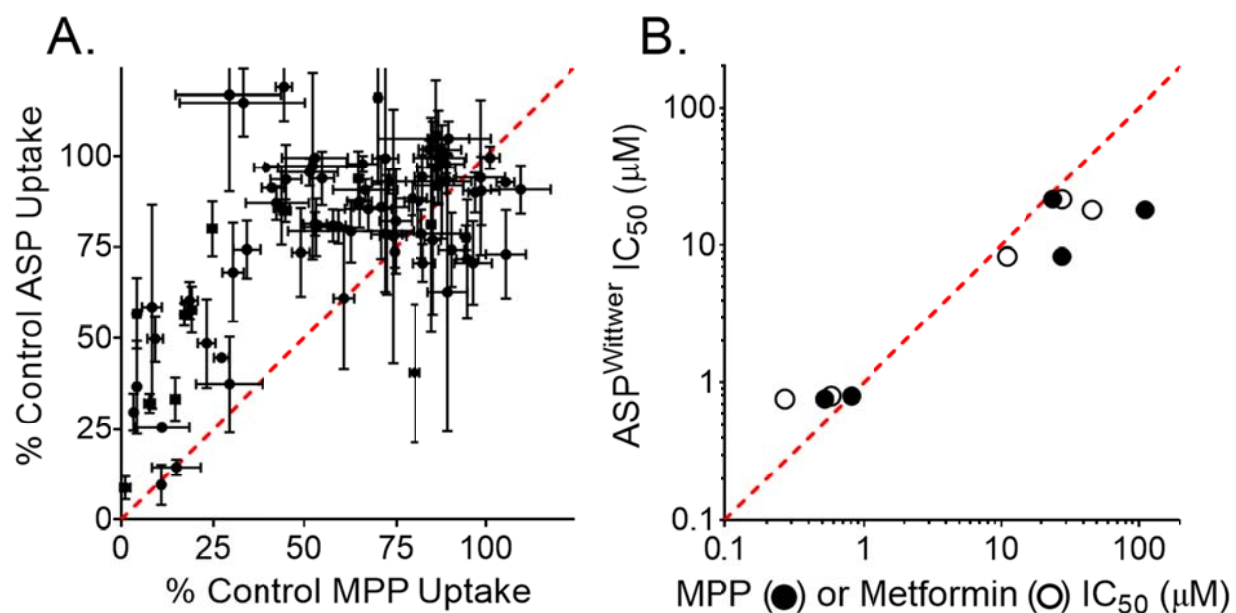

Supplemental Figure 3 (A) Comparison of the inhibition of MATE1-mediated transport of [ $^3H$ ]MPP resulting from exposure to a 50  $\mu M$  concentration of 86 compounds from the NCC, determined in the present study, to the inhibition of MATE1-mediated ASP transport that resulted from exposure to a 20  $\mu M$  concentration of the same compounds as reported in the study of Wittwer et al. (*J Med Chem*, 56, 781, 2013). (B) Comparison of  $IC_{50}$  values for five compounds for inhibition of MATE1-mediated transport of MPP (solid circles) or metformin (open circles) determined in the present study, to those reported for inhibition of MATE1-mediated ASP transport by Wittwer et al. (*J Med Chem*, 56, 781, 2013).

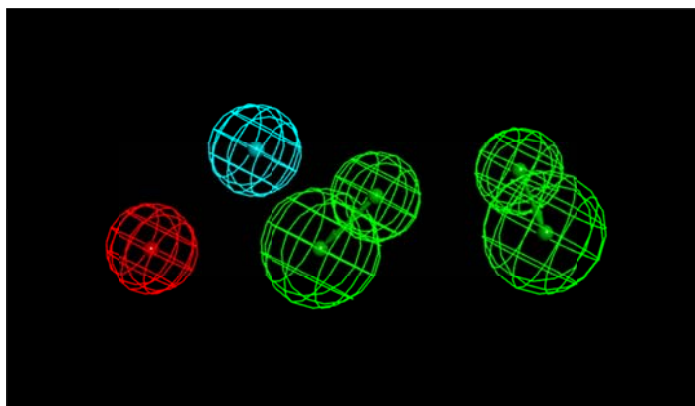

Supplemental Figure 4. N32 Pharmacophore for MPP

Supplemental Figure 5. A. Good features in the consensus MATE1 Bayesian model. B. Bad features in the consensus MATE1 Bayesian model.

A.

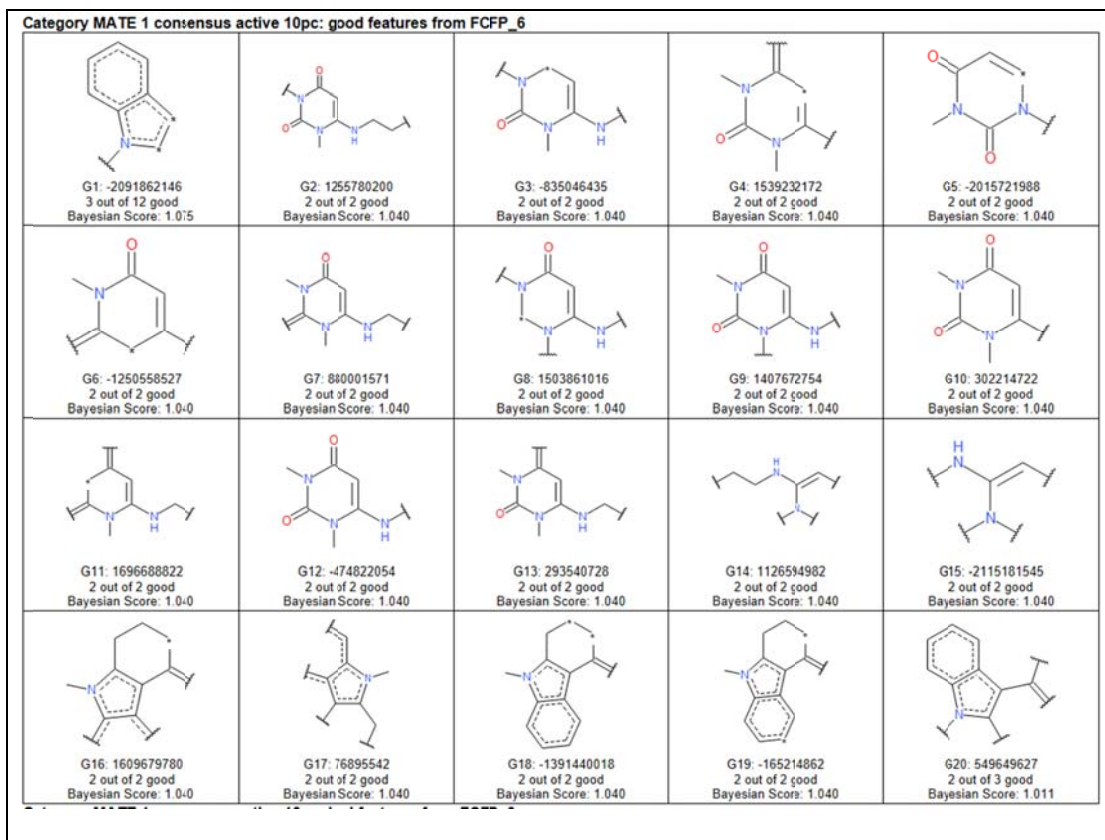

B.

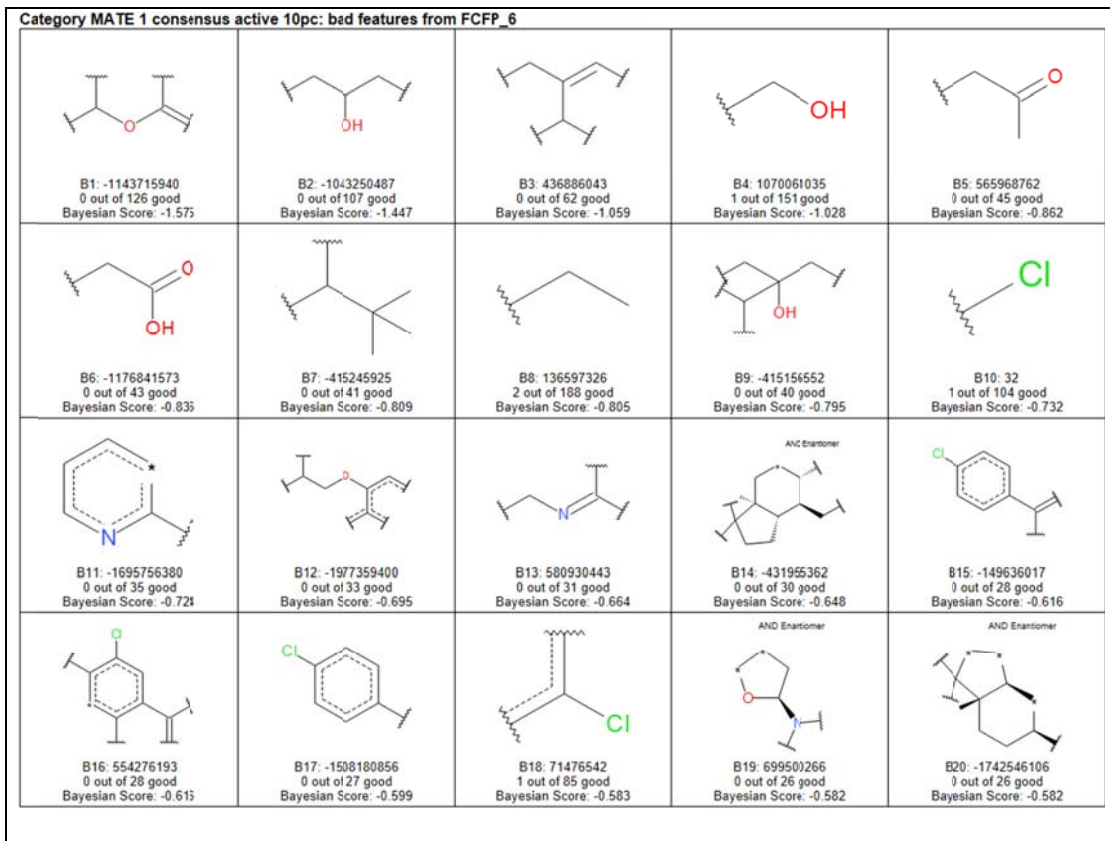

Supplemental Table 1. Pharmacophore predictions

| Test Molecules | Measured IC <sub>50</sub> against MPP (μM) | Cimetidine IC <sub>50</sub> prediction (μM) | Metformin IC <sub>50</sub> prediction (μM) | MPP IC <sub>50</sub> prediction (μM) | NBD-MTMA IC <sub>50</sub> prediction (μM) |
|----------------|--------------------------------------------|---------------------------------------------|--------------------------------------------|--------------------------------------|-------------------------------------------|
| BMIM           | 179                                        | 256                                         | 312                                        | 247                                  | 340                                       |
| NBuPY          | 26.5                                       | 1,514                                       | 312                                        | 821                                  | 2,056                                     |
| alosetron      | 0.1                                        | 259                                         | 12.7                                       | 121                                  | 343                                       |
| levofloxacin   | 51.6                                       | 256                                         | 254                                        | 119                                  | 208                                       |
| nifekalant     | 2.9                                        | 106                                         | 52.1                                       | 31.3                                 | 70.8                                      |
| terbinafine    | 1,209                                      | 369                                         | 14.7                                       | 307                                  | 501                                       |

Supplemental Table 2. Bayesian models statistics using Discovery Studio and CDD Models for the 400 molecules.

|                         | ROC 5 fold          | Sensitivity        | Specificity        | Concordance        | CDD Bayesian 3 fold ROC FCFP6 only |
|-------------------------|---------------------|--------------------|--------------------|--------------------|------------------------------------|
| MPP                     | 0.697               | 1.00               | 0.358              | 0.403              | 0.69                               |
| NBD-MTMA                | 0.633               | 0.957              | 0.875              | 0.880              | 0.65                               |
| Cimetidine              | 0.652               | 1.00               | 0.485              | 0.512              | 0.65                               |
| Metformin               | 0.655               | 0.909              | 0.765              | 0.772              | 0.63                               |
| <b><i>Consensus</i></b> | <b><i>0.761</i></b> | <b><i>1.00</i></b> | <b><i>0.68</i></b> | <b><i>0.69</i></b> | <b><i>0.82</i></b>                 |

Bayesian models were generated with the complete 400 molecules for each substrate probes. The 5 fold cross validation ROC values were MPP (0.70), NBD-MTMA (0.63), cimetidine (0.65), Metformin (0.65). These models also enable the determination of good and bad features in the molecules (Supp Fig 5). A consensus model was created using 12 molecules out of the 400 that were considered active across all 4 substrate probes. This model had a 5 fold cross validation ROC = 0.76 (Supp Fig. 5). The good features in the 12 active compounds mainly consisted of nitrogen containing heterocycles (Supp Figure 5). The 26 molecules with IC<sub>50</sub> data for each probe were also used to build Bayesian models with actives classed as IC<sub>50</sub> < 50 μM MPP (0.60), NBD-MTMA (0.67), cimetidine (0.79), Metformin (0.60). Ideally these ROC values should be 0.75 or preferably higher to be useful for predictions.



Supplemental Table 3. Bayesian models statistics using Discovery Studio for the 26 molecules.

|            | ROC 5 fold | Sensitivity | Specificity | Concordance |
|------------|------------|-------------|-------------|-------------|
| MPP        | 0.597      | 1.00        | 0.818       | 0.920       |
| NBD-MTMA   | 0.667      | 0.833       | 0.923       | 0.880       |
| Cimetidine | 0.673      | 0.923       | 0.917       | 0.920       |
| Metformin  | 0.597      | 0.875       | 0.778       | 0.840       |

# Lack of Influence of Substrate on Ligand Interaction with the Human Multidrug And Toxin Extruder, MATE1

Lucy J Martínez-Guerrero, Mark Morales, Sean Ekins and Stephen H Wright

Molecular Pharmacology

**Inhibition by 50  $\mu$ M of each NCC compound (as percent control, i.e., transport in the absence of inhibitor)**

**NCC Plate 1-5 (NGP-105-01-05) - Single Concentration ( 50  $\mu$ M) Inhibition Summary**

| Plate row | Plate 1                   | SMILES                                                                                                             | Plate column | MPP   |      |      |    | NBD-MTMA |      |      |    | CIMETIDINE |      |      |    | METFORMIN |     |      |    |
|-----------|---------------------------|--------------------------------------------------------------------------------------------------------------------|--------------|-------|------|------|----|----------|------|------|----|------------|------|------|----|-----------|-----|------|----|
|           |                           |                                                                                                                    |              | Mean  | SE   | IC50 | SE | Mean     | SE   | IC50 | SE | Mean       | SE   | IC50 | SE | Mean      | SE  | IC50 | SE |
|           |                           |                                                                                                                    |              | 100.0 | 0.0  |      |    | 100.0    | 0.0  |      |    | 100.0      | 0.0  |      |    | 100.0     | 0.0 |      |    |
| <b>A</b>  | BUPROPION HYDROCHLORIDE   | <chem>CC(NC(C)(C)C(=O)c1cccc(Cl)c1.Cl</chem>                                                                       | 2            | 54.8  | 3.3  |      |    | 56.8     | 9.5  |      |    | 39.7       | 1.7  |      |    | 60.9      | 4.3 |      |    |
|           | PAZUFLOXACIN              | <chem>C[C@H]1COc2c(c(F)cc3c(=O)c(c1n1c23)C(=O)O)C4(N)CC4</chem>                                                    | 3            | 86.0  | 3.4  |      |    | 85.7     | 3.0  |      |    | 92.5       | 7.9  |      |    | 85.3      | 3.0 |      |    |
|           | TOPOTECAN HYDROCHLORIDE   | <chem>CC[C@@]1(O)C(=O)OCc2c1cc3-c4nc5ccc(O)c(CN(C)C)c5cc4Cn3c2=O.Cl</chem>                                         | 4            | 9.2   | 2.1  |      |    | 9.5      | 5.2  |      |    | 9.6        | 0.4  |      |    | 6.0       | 0.7 |      |    |
|           | NAFTOPIDIL                | <chem>COc1cccc1N2CCN(CC(O)COc3ccc4cccc34)CC2</chem>                                                                | 5            | 66.5  | 8.7  |      |    | 65.8     | 11.6 |      |    | 71.2       | 17.0 |      |    | 65.5      | 3.4 |      |    |
|           | ROSIGLITAZONE MALEATE     | <chem>CN(CCOC1ccc(CC2SC(=O)NC2=O)cc1)c3cccn3.Oc(=O)/C=C(=O)O</chem>                                                | 6            | 1.2   | 2.9  |      |    | -8.9     | 6.1  |      |    | 0.9        | 3.1  |      |    | 1.8       | 0.3 |      |    |
|           | BICALUTAMIDE              | <chem>CC(O)(CS(=O)(=O)c1ccc(F)cc1)C(=O)Nc2ccc(C#N)c(c2)C(F)(F)F</chem>                                             | 7            | 82.7  | 16.9 |      |    | 83.5     | 16.5 |      |    | 90.3       | 3.8  |      |    | 90.1      | 6.3 |      |    |
|           |                           | <chem>Fc1cn(C2CCCO2)c(=O)[nH]c1=O</chem>                                                                           | 8            | 95.9  | 2.9  |      |    | 85.7     | 4.2  |      |    | 100.8      | 5.9  |      |    | 89.4      | 5.1 |      |    |
|           | ISOQUERCITRIN             | <chem>OC[C@H]1O[C@@H](Oc2c(oc3cc(O)cc(O)c3c2=O)c4ccc(O)c(O)c4)[C@H](O)[C@@H](O)[C@@H]1O</chem>                     | 9            | 98.8  | 7.6  |      |    | 65.9     | 3.3  |      |    | 89.9       | 6.0  |      |    | 59.9      | 9.6 |      |    |
|           | DOXORUBICIN HYDROCHLORIDE | <chem>COc1cccc2C(=O)c3c(O)c4C[C@](O)(C[C@H](O)[C@H]5C[C@H](N)[C@H](O)[C@H](C)O5)c4c(O)c3C(=O)c12)C(=O)CO.Cl</chem> | 10           | 49.1  | 2.4  |      |    | 44.1     | 8.8  |      |    | 83.0       | 3.4  |      |    | 40.6      | 3.7 |      |    |
|           | MIDAZOLAM HYDROCHLORIDE   | <chem>Cc1nc2CN=C(c3ccccc3F)c4cc(Cl)ccc4-n12.Cl</chem>                                                              | 11           | 5.9   | 4.3  |      |    | 2.2      | 3.7  |      |    | 4.2        | 6.5  |      |    | 3.7       | 0.3 |      |    |
| <b>B</b>  | IRSOGLADINE MALEATE       | <chem>Nc1nc(N)nc(n1)c2cc(Cl)ccc2Cl.Oc(=O)/C=C(=O)O</chem>                                                          | 2            | 89.9  | 6.3  |      |    | 84.9     | 3.5  |      |    | 76.9       | 30.2 |      |    | 95.7      | 4.6 |      |    |
|           | MIGLITOL                  | <chem>OCCN1C[C@H](O)[C@@H](O)[C@H](O)[C@H]1CO</chem>                                                               | 3            | 94.5  | 0.1  |      |    | 95.2     | 4.2  |      |    | 106.6      | 4.4  |      |    | 94.3      | 3.9 |      |    |

|                      |                                                                                                                                                                                                      |    |       |      |  |  |      |      |  |  |       |      |  |  |      |     |  |  |
|----------------------|------------------------------------------------------------------------------------------------------------------------------------------------------------------------------------------------------|----|-------|------|--|--|------|------|--|--|-------|------|--|--|------|-----|--|--|
| LEVETIRACETAM        | <chem>CC[C@H](N1CCCC1=O)C(=O)N</chem>                                                                                                                                                                | 4  | 95.1  | 4.9  |  |  | 89.7 | 5.9  |  |  | 97.3  | 2.7  |  |  | 87.4 | 5.9 |  |  |
| NOBILETIN            | <chem>COc1ccc(cc1OC)c2cc(=O)c3c(O)C(OC)c(OC)c(OC)c3o2</chem>                                                                                                                                         | 5  | 13.7  | 0.5  |  |  | 11.9 | 4.3  |  |  | 37.6  | 16.0 |  |  | 7.3  | 0.5 |  |  |
| ESCITALOPRAM OXALATE | <chem>CN(C)CCC[C@]1(OCC2cc(C#N)ccc21)c3ccc(F)cc3.OC(=O)C(=O)O</chem>                                                                                                                                 | 6  | 47.8  | 2.3  |  |  | 51.4 | 1.6  |  |  | 55.6  | 1.2  |  |  | 40.1 | 4.1 |  |  |
| BENIDIPINE HCL       | <chem>CO/C(=C1/[C@H](C(=C(C)N=C1C)C(=O)O[C@@H]2CCCN(Cc3ccc3)C2)c4cccc(c4)[N+](=O)[O-])/O.Cl</chem>                                                                                                   | 7  | 62.2  | 3.3  |  |  | 53.1 | 2.1  |  |  | 75.6  | 10.7 |  |  | 68.0 | 8.0 |  |  |
| OLIGOMYCIN C         | <chem>CC[C@H]1CC[C@H]2O[C@@]3(CC[C@@H](C)[C@@H](C[C@H](C)O)O3)[C@H](C)[C@@H](OC(=O)C=C[C@@H](C)[C@H](O)[C@@H](C)C(=O)[C@@H](C)[C@H](O)[C@@H](C)C(=O)[C@H](C)[C@H](O)[C@@H](C)CC=CC=C1)[C@H]2C</chem> | 8  | 101.9 | 11.0 |  |  | 94.8 | 3.9  |  |  | 110.0 | 6.4  |  |  | 94.0 | 0.9 |  |  |
|                      | <chem>CCOC(=O)c1ncn-2c1CN(C)C(=O)c3cc(F)ccc32</chem>                                                                                                                                                 | 9  | 76.1  | 2.6  |  |  | 77.5 | 5.9  |  |  | 96.8  | 9.7  |  |  | 71.2 | 1.7 |  |  |
| MOXONIDINE HCL       | <chem>COc1nc(C)nc(Cl)c1NC2=NCCN2.Cl</chem>                                                                                                                                                           | 10 | 74.8  | 4.4  |  |  | 71.9 | 2.1  |  |  | 97.4  | 9.0  |  |  | 66.9 | 6.1 |  |  |
| LAMIVUDINE           | <chem>Nc1ccn([C@@H]2CS[C@H](CO)O2)c(=O)n1</chem>                                                                                                                                                     | 11 | 85.1  | 1.1  |  |  | 85.4 | 7.0  |  |  | 86.7  | 2.8  |  |  | 82.7 | 3.0 |  |  |
| ACARBOSE             | <chem>C[C@H]1O[C@H](O[C@H]2[C@@H](O)[C@@H](O)[C@@H](O)[C@H]3[C@H](O)[C@@H](O)C(O)O[C@@H]3CO)O[C@@H]2CO)[C@H](O)[C@@H](O)[C@@H]1N[C@H]4C=C(CO)[C@@H](O)[C@H](O)[C@H]4O</chem>                         | 2  | 95.1  | 5.6  |  |  | 86.4 | 5.9  |  |  | 111.7 | 10.5 |  |  | 93.0 | 4.1 |  |  |
|                      | <chem>COc1ccc(/C=C/C(=O)Nc2ccccc2C(=O)O)cc1OC</chem>                                                                                                                                                 | 3  | 87.5  | 1.8  |  |  | 89.5 | 2.0  |  |  | 106.0 | 12.4 |  |  | 86.7 | 0.5 |  |  |
|                      | <chem>CCCN[C@H]1CCc2nc(N)sc2C1.Cl</chem>                                                                                                                                                             | 4  | 61.6  | 8.9  |  |  | 50.7 | 5.9  |  |  | 69.7  | 0.1  |  |  | 55.3 | 0.4 |  |  |
| FINASTERIDE          | <chem>CC(C)(C)NC(=O)[C@H]1CC[C@H]2[C@@H]3CC[C@H]4NC(=O)C=C[C@]4(C)[C@H]3CC[C@]12C</chem>                                                                                                             | 5  | 8.4   | 2.7  |  |  | 12.4 | 2.5  |  |  | 22.5  | 2.8  |  |  | 11.2 | 2.2 |  |  |
|                      | <chem>CC1CCC[C@H](O)CCCCc2cc(O)cc(O)c2C(=O)O1</chem>                                                                                                                                                 | 6  | 62.3  | 12.4 |  |  | 56.6 | 11.3 |  |  | 94.9  | 6.0  |  |  | 73.0 | 1.7 |  |  |
| AMLEXANOX            | <chem>CC(C)c1ccc2oc3nc(N)c(cc3c(=O)c2c1)C(=O)O</chem>                                                                                                                                                | 7  | 66.5  | 0.3  |  |  | 65.6 | 9.2  |  |  | 101.1 | 3.8  |  |  | 83.9 | 5.5 |  |  |

**C**

|                     |                                                                                        |                                                                             |      |      |      |     |      |       |      |     |       |       |      |     |      |       |      |     |      |
|---------------------|----------------------------------------------------------------------------------------|-----------------------------------------------------------------------------|------|------|------|-----|------|-------|------|-----|-------|-------|------|-----|------|-------|------|-----|------|
| D                   | BENZAEPRI<br>L HYDROCHLORIDE                                                           | CCOC(=O)[C@H]((CCc1ccccc1)N[C@H]2CCc3ccccc3N(CC(=O)O)C2=O.Cl                | 8    | 88.7 | 9.6  |     |      | 97.3  | 8.2  |     |       | 123.6 | 7.7  |     |      | 99.8  | 3.6  |     |      |
|                     |                                                                                        | OC(=O)/C=C/c1ccc(Cn2ccnc2)cc1.Cl                                            | 9    | 64.3 | 2.4  |     |      | 62.7  | 1.8  |     |       | 73.6  | 0.5  |     |      | 57.2  | 2.5  |     |      |
|                     |                                                                                        | [O-][N+](=O)c1ccc2NC(=O)CN=C(c3ccccc3)c2c1                                  | 10   | 63.1 | 8.6  |     |      | 56.2  | 3.3  |     |       | 85.0  | 9.0  |     |      | 48.7  | 0.1  |     |      |
|                     | 366-70-1                                                                               | CNNC1ccc(cc1)C(=O)NC(C)C.Cl                                                 | 11   | 72.7 | 1.7  |     |      | 74.8  | 4.2  |     |       | 101.5 | 3.7  |     |      | 76.1  | 2.9  |     |      |
|                     | BENPROPERINE<br>PHOSPHATE                                                              | CC(COC1ccccc1Cc2ccccc2)N3CCC3.OP(=O)(O)O                                    | 2    | 29.4 | 4.1  |     |      | 23.9  | 0.9  |     |       | 26.0  | 6.5  |     |      | 21.2  | 1.2  |     |      |
|                     | OLANZAPINE                                                                             | CN1CCN(CC1)C2=Nc3ccccc3Nc4sc(C)cc24                                         | 3    | 29.3 | 14.5 |     |      | 47.8  | 1.8  |     |       | 68.4  | 1.9  |     |      | 39.0  | 0.1  |     |      |
|                     | RISPERIDONE                                                                            | Cc1nc2CCCCn2c(=O)c1CCN3CC(C(C3)c4noc5cc(F)ccc45                             | 4    | 5.5  | 1.5  |     |      | 5.9   | 6.2  |     |       | 4.8   | 1.0  |     |      | 5.2   | 2.7  |     |      |
|                     | ZOLPIDEM TARTRATE                                                                      | CN(C)C(=O)Cc1c(nc2ccc(C)cn12)c3ccc(C)cc3.OC(C(O)C(=O)O)C(=O)O               | 5    | 41.3 | 3.3  |     |      | 48.0  | 6.2  |     |       | 60.9  | 1.6  |     |      | 35.8  | 1.7  |     |      |
|                     | LATANOPROST                                                                            | CC(C)OC(=O)CCC/C=C\C[C@H]1[C@@H](O)C[C@@H](O)[C@@H]1CC[C@@H](O)CCc2ccccc2   | 6    | 49.2 | 5.2  |     |      | 53.0  | 9.9  |     |       | 49.0  | 12.9 |     |      | 53.1  | 2.5  |     |      |
|                     | <b>CERIVASTATIN SODIUM</b>                                                             | COc1c(nc(C(C)C)/C=C/[C@@H](O)C[C@@H](O)CC(=O)[O-])c1c2ccc(F)cc2)C(C)C.[Na+] | 7    | 88.0 | 8.0  | 249 | 55.9 | 80.3  | 9.9  | 170 | 47.3  | 100.6 | 8.2  | 204 | 58.6 | 86.6  | 6.7  | 241 | 50.4 |
|                     |                                                                                        | C[C@]1(O)CC[C@H]2[C@@H]3CC[C@H]4CC(=C(C[C@]4(C)[C@H]3CC[C@@]21C)C=O)O       | 8    | 85.3 | 31.1 |     |      | 130.3 | 21.2 |     |       | 71.8  | 6.8  |     |      | 119.1 | 11.3 |     |      |
| HYPEROSIDE          | OC[C@H]1O[C@@H](Oc2c(oc3cc(O)cc(O)c3c2=O)c4ccc(O)c(O)c4)[C@H](O)[C@@H](O)[C@H]1O       | 9                                                                           | 85.3 | 5.0  |      |     | 77.6 | 5.4   |      |     | 103.5 | 2.6   |      |     | 80.7 | 11.6  |      |     |      |
| PEFLOXACIN MESYLATE | CCn1cc(C(=O)O)c(=O)c2cc(F)c(c12)N3CCN(C)CC3.CS(=O)(=O)O                                | 10                                                                          | 45.1 | 1.6  |      |     | 42.0 | 0.8   |      |     | 74.8  | 2.3   |      |     | 39.1 | 1.0   |      |     |      |
| ESOMEPRAZOLE MG     | COc1ccc2n([Mg]n3c(nc4cc(OC)ccc34)S(=O)Cc5ncc(C)c(OC)c5C)c(nc2c1)S(=O)Cc6ncc(C)c(OC)c6C | 11                                                                          | 23.4 | 6.4  |      |     | 17.3 | 3.6   |      |     | 40.7  | 2.7   |      |     | 14.2 | 2.2   |      |     |      |
| E                   |                                                                                        | NC(=O)OCCc1ccccc1                                                           | 2    | 76.6 | 5.6  |     |      | 77.0  | 5.9  |     |       | 94.4  | 11.1 |     |      | 79.1  | 2.5  |     |      |
|                     | NEFAZODONE                                                                             | CCc1nn(CCCN2CCN(CC2)c3cccc(Cl)c3)c(=O)n1CCOc4ccccc4.Cl                      | 3    | 42.5 | 8.8  |     |      | 50.7  | 8.9  |     |       | 48.7  | 22.1 |     |      | 51.1  | 3.5  |     |      |
|                     | PIOGLITAZONE<br>HYDROCHLORIDE                                                          | CCc1ccc(CCOc2ccc(CC3SC(=O)NC3=O)cc2)nc1.Cl                                  | 4    | 76.2 | 6.2  |     |      | 85.3  | 4.9  |     |       | 104.9 | 13.4 |     |      | 86.6  | 1.5  |     |      |

|                                      |                                                                                                                                                                     |    |      |     |      |      |      |      |      |      |       |      |      |      |      |      |     |      |
|--------------------------------------|---------------------------------------------------------------------------------------------------------------------------------------------------------------------|----|------|-----|------|------|------|------|------|------|-------|------|------|------|------|------|-----|------|
| VIRAMUNE                             | <chem>Cc1ccnc2N(C3CC3)c4ncccc4C(=O)Nc12</chem>                                                                                                                      | 5  | 68.6 | 0.9 |      |      | 68.5 | 7.2  |      |      | 92.5  | 19.0 |      |      | 66.6 | 0.8  |     |      |
|                                      | <chem>OC[C@@H]1CC[C@@H](O1)n2cnc3c(O)ncnc23</chem>                                                                                                                  | 6  | 84.2 | 5.5 |      |      | 92.7 | 6.1  |      |      | 94.3  | 18.1 |      |      | 84.7 | 0.9  |     |      |
| ICARIIN                              | <chem>COC1ccc(cc1)c2oc3c(CC=C(C)C)c(O[C@@H]4O[C@H](CO)[C@@H](O)[C@H](O)[C@H]4O)cc(O)c3c(=O)c2O[C@@H]5O[C@@H](C)[C@H](O)[C@H](O)[C@H]5O</chem>                       | 7  | 58.2 | 9.7 |      |      | 50.2 | 8.2  |      |      | 85.4  | 15.2 |      |      | 93.0 | 22.0 |     |      |
| 35212-22-7                           | <chem>CC(C)Oc1ccc2c(=O)c(coc2c1)c3ccccc3</chem>                                                                                                                     | 8  | 88.7 | 7.8 |      |      | 89.2 | 2.6  |      |      | 104.7 | 8.7  |      |      | 88.7 | 4.5  |     |      |
| RIFABUTIN                            | <chem>CO[C@H]1C=CO[C@@]2(C)Oc3c(C2=O)c4c5=NC6(CCN(CC(C)C)CC6)N=c5c(NC(=O)C=CC=C[C@H](C)[C@H](O)[C@H](C)[C@@H](O)[C@@H](C)[C@H](OC(=O)C)[C@H]1C)c(O)c4c(O)c3C</chem> | 9  | 65.8 | 4.3 |      |      | 77.7 | 4.6  |      |      | 80.7  | 11.3 |      |      | 75.1 | 11.6 |     |      |
| <b>VENLAFAXINE<br/>HYDROCHLORIDE</b> | <chem>COc1ccc(cc1)C(CN(C)C)C2(O)CCCCC2.Cl</chem>                                                                                                                    | 10 | 75.9 | 5.8 | 366  | 55.0 | 88.1 | 13.2 | 332  | 34.4 | 68.7  | 4.9  | 303  | 33.6 | 86.9 | 26.0 | 168 | 25.8 |
| SULFASALAZINE                        | <chem>OC(=O)c1cc(N=Nc2ccc(cc2)S(=O)(=O)Nc3ccccc3)ccc1O</chem>                                                                                                       | 11 | 53.0 | 3.2 |      |      | 46.1 | 12.5 |      |      | 68.6  | 7.3  |      |      | 55.2 | 2.8  |     |      |
| <b>F</b>                             | <chem>C[C@@]1(C[C@@H]2C[C@]3(C)C1)C[C@](N)(C2)C3.Cl</chem>                                                                                                          | 2  | 53.5 | 3.5 |      |      | 59.0 | 6.6  |      |      | 36.2  | 6.5  |      |      | 53.9 | 5.5  |     |      |
| MOXIFLOXACIN<br>HYDROCHLORIDE        | <chem>COc1c(N2C[C@@H]3CCCN[C@@H]3C2)c(F)cc4c(=O)c(cn(C5CC5)c14)C(=O)O.Cl</chem>                                                                                     | 3  | 41.5 | 3.5 |      |      | 36.6 | 0.7  |      |      | 57.0  | 6.6  |      |      | 33.8 | 2.0  |     |      |
| CILASTATIN SODIUM                    | <chem>CC1(C)C[C@@H]1C(=O)N/C(=C)\CCCCSC[C@H](N)C(=O)O/C(=O)[O-].[Na+]</chem>                                                                                        | 4  | 90.6 | 6.8 |      |      | 96.0 | 0.9  |      |      | 101.3 | 4.7  |      |      | 91.8 | 2.2  |     |      |
| TOPIRAMATE                           | <chem>CC1(C)O[C@@H]2CO[C@@]3(COS(=O)(=O)N)OC(C)O[C@H]3[C@@H]2O1</chem>                                                                                              | 5  | 81.5 | 4.4 |      |      | 95.9 | 4.9  |      |      | 79.6  | 16.5 |      |      | 84.0 | 2.2  |     |      |
| SERTRALINE                           | <chem>CN[C@H]1CC[C@@H](c2ccc(Cl)c(Cl)c2)c3ccccc13.Cl</chem>                                                                                                         | 6  | 51.5 | 7.6 |      |      | 54.9 | 2.1  |      |      | 62.5  | 4.4  |      |      | 48.0 | 1.8  |     |      |
| METHYLANDROSTENEDI<br>OL             | <chem>C[C@]1(O)CC[C@H]2[C@@H]3CC=C4C[C@@H](O)CC[C@]4(C)[C@H]3CC[C@@]21C</chem>                                                                                      | 7  | 77.8 | 6.3 |      |      | 84.8 | 8.4  |      |      | 94.2  | 13.0 |      |      | 87.6 | 6.1  |     |      |
| OXAPROZIN                            | <chem>OC(=O)CCc1nc(c(o1)c2ccccc2)c3ccccc3</chem>                                                                                                                    | 8  | 89.8 | 5.6 |      |      | 97.2 | 11.5 |      |      | 111.5 | 0.4  |      |      | 98.8 | 1.0  |     |      |
| <b>ESMOLOL<br/>HYDROCHLORIDE</b>     | <chem>COC(=O)CCc1ccc(OCC(O)CNC(C)C)cc1.Cl</chem>                                                                                                                    | 9  | 30.5 | 2.8 | 16.2 | 0.9  | 37.0 | 4.0  | 24.5 | 2.9  | 30.4  | 5.1  | 12.7 | 1.6  | 35.0 | 2.9  | 11  | 1.0  |
| PANTOPRAZOLE SODIUM                  | <chem>COc1ccnc(CS(=O)c2nc3cc(OC(F)F)ccc3[n-]2)c1OC.[Na+]</chem>                                                                                                     | 10 | 22.8 | 1.8 |      |      | 22.7 | 4.5  |      |      | 36.2  | 6.1  |      |      | 19.6 | 3.5  |     |      |
| TORASEMIDE                           | <chem>CC(C)NC(=O)NS(=O)(=O)c1nccc1Nc2ccccc(C)c2</chem>                                                                                                              | 11 | 93.8 | 6.0 |      |      | 97.3 | 9.4  |      |      | 95.3  | 19.8 |      |      | 83.9 | 17.2 |     |      |

|   |                           |                                                                                                                     |    |       |      |     |      |      |      |     |      |       |      |     |      |       |     |     |      |
|---|---------------------------|---------------------------------------------------------------------------------------------------------------------|----|-------|------|-----|------|------|------|-----|------|-------|------|-----|------|-------|-----|-----|------|
| G | CARVEDILOL                | <chem>COc1cccc1OCCNCC(O)COc2ccc3[nH]c4cccc4c23</chem>                                                               | 2  | 62.7  | 17.0 |     |      | 56.3 | 10.4 |     |      | 47.8  | 13.4 |     |      | 44.8  | 1.0 |     |      |
|   | NELFINAVIR MESYLATE       | <chem>Cc1c(O)cccc1C(=O)N[C@@H](CSc2cccc2)[C@H](O)CN3C[C@H]4CCCC[C@H]4C[C@H]3C(=O)N(C)(C)C.CS(=O)(=O)O</chem>        | 3  | 33.1  | 17.2 |     |      | 68.6 | 2.8  |     |      | 97.3  | 0.3  |     |      | 62.2  | 0.9 |     |      |
|   | ARGATROBAN                | <chem>C[C@@H]1CCN([C@H](C1)C(=O)O)C(=O)[C@H](CCCN=C(N)N)NS(=O)(=O)c2cccc3CC(C)Cn23</chem>                           | 4  | 71.5  | 7.9  |     |      | 78.1 | 0.3  |     |      | 100.4 | 4.5  |     |      | 77.8  | 7.9 |     |      |
|   | VORICONAZOLE              | <chem>C[C@@H](c1ncnc1F)[C@](O)(Cn2cncn2)c3ccc(F)cc3F</chem>                                                         | 5  | 91.3  | 11.9 |     |      | 80.1 | 2.9  |     |      | 100.7 | 3.0  |     |      | 77.3  | 5.4 |     |      |
|   | CALCIPOTRIOL              | <chem>C[C@H](/C=C/[C@H](O)C1CC1)[C@H]2CC[C@H]3\C=C\C=C/4\C[C@@H](O)C[C@H](O)C4=C)\CCC[C@]23C</chem>                 | 6  | 29.7  | 2.8  |     |      | 36.5 | 7.6  |     |      | 47.6  | 0.9  |     |      | 28.5  | 4.0 |     |      |
|   | TRIPTOLIDE                | <chem>CC(C)[C@@]12O[C@H]2[C@@H]3O[C@]34[C@]5(O[C@H]5C[C@H]6C7=C(CC[C@@]64)C(=O)OC7)[C@@H]1O</chem>                  | 7  | 81.1  | 5.2  |     |      | 86.1 | 7.2  |     |      | 109.3 | 0.7  |     |      | 82.8  | 5.8 |     |      |
|   | <b>ROLIPRAM</b>           | <chem>COc1ccc(cc1OC2CCCC2)C3CNC(=O)C3</chem>                                                                        | 8  | 59.0  | 1.6  | 147 | 12.9 | 62.7 | 2.2  | 183 | 40.8 | 73.3  | 1.1  | 111 | 11.4 | 62.4  | 1.4 | 124 | 11.0 |
|   | TADALAFIL                 | <chem>CN1CC(=O)N2[C@@H](c3[nH]c4cccc4c3C[C@@H]2C1=O)c5ccc6OCOc6c5</chem>                                            | 9  | 59.5  | 10.4 |     |      | 74.3 | 21.3 |     |      | 90.8  | 2.0  |     |      | 106.5 | 2.4 |     |      |
|   | FLUTICASONE PROPIONATE    | <chem>CCC(=O)O[C@@]1([C@H](C)C[C@H]2[C@@H]3C[C@H](F)C4=CC(=O)C=C[C@]4(C)[C@@]3(F)[C@@H](O)C[C@@]21C)C(=O)SCF</chem> | 10 | 92.1  | 7.7  |     |      | 71.6 | 11.6 |     |      | 120.6 | 12.1 |     |      | 89.7  | 1.1 |     |      |
|   | TROPISETRONÂ HYDROCLORIDE | <chem>CN1[C@H]2CC[C@@H]1C[C@@H](C2)OC(=O)c3c[nH]c4cccc34.Cl</chem>                                                  | 11 | 1.6   | 1.1  |     |      | -1.6 | 4.6  |     |      | 2.1   | 1.5  |     |      | 2.2   | 0.2 |     |      |
| H | LOMIFYLLINE               | <chem>CC(=O)CCCN1cnc2n(C)c(=O)n(C)c(=O)c12</chem>                                                                   | 2  | 50.0  | 4.6  |     |      | 47.3 | 4.3  |     |      | 72.1  | 6.4  |     |      | 45.7  | 4.9 |     |      |
|   | PRAVASTATIN SODIUM        | <chem>CC[C@H](C)C(=O)O[C@H]1C[C@H](O)C=C2C=C[C@H](C)[C@H]1(CC[C@@H](O)C[C@@H](O)C(C(=O)[O-])[C@@H]12.[Na+]</chem>   | 3  | 105.3 | 5.4  |     |      | 91.9 | 3.9  |     |      | 117.1 | 7.2  |     |      | 99.6  | 4.9 |     |      |
|   | VALDECOXIB                | <chem>Cc1onc(c1c2ccc(cc2)S(=O)(=O)N)c3cccc3</chem>                                                                  | 4  | 79.1  | 8.0  |     |      | 36.7 | 21.2 |     |      | 107.1 | 5.9  |     |      | 86.6  | 1.2 |     |      |
|   | FENOLDOPAM MESYLATE       | <chem>Oc1ccc(cc1)C2CNCCc3c(Cl)c(O)c(O)cc23.CS(=O)(=O)O</chem>                                                       | 5  | 12.5  | 2.5  |     |      | 15.5 | 6.8  |     |      | 20.8  | 4.7  |     |      | 9.9   | 0.2 |     |      |

|                                               |                                                                                                                                                                       |    |       |      |      |      |       |      |       |      |
|-----------------------------------------------|-----------------------------------------------------------------------------------------------------------------------------------------------------------------------|----|-------|------|------|------|-------|------|-------|------|
| EPIRUBICIN HYDROCHLORIDE                      | <chem>COc1cccc2C(=O)c3c(O)c4C[C@](O)(C[C@H](O)[C@H]5C[C@H](N)[C@@H](O)[C@H](C)O5)c4c(O)c3C(=O)c12)C(=O)CO.Cl</chem>                                                   | 6  | 16.6  | 0.5  | 22.8 | 6.9  | 45.6  | 11.8 | 16.3  | 1.0  |
| ROSIGLITAZONE HCL                             | <chem>CN(CCOC1ccc(CC2SC(=O)NC2=O)cc1)c3cccn3.Cl</chem>                                                                                                                | 7  | 0.5   | 0.9  | -0.7 | 3.7  | 1.2   | 0.3  | 2.4   | 2.1  |
| MOSAPRIDE CITRATE                             | <chem>CCOC1cc(N)c(Cl)cc1C(=O)NCC2CN(Cc3ccc(F)cc3)CCO2.OC(=O)CC(O)(CC(=O)O)C(=O)O</chem>                                                                               | 8  | 72.8  | 29.5 | 66.8 | 18.3 | 98.8  | 15.0 | 85.4  | 0.5  |
|                                               | <chem>NC(=O)CS(=O)C(c1cccc1)c2ccc cc2</chem>                                                                                                                          | 9  | 88.8  | 2.8  | 95.0 | 5.2  | 120.3 | 13.9 | 101.1 | 10.4 |
| INDINAVIR SULFATE                             | <chem>CC(C)(C)NC(=O)[C@@H]1CN(Cc2ccnc2)CCN1C[C@@H](O)C[C@@H](Cc3ccccc3)C(=O)N[C@@H]4[C@H](O)Cc5ccccc45.OS(=O)(=O)O</chem>                                             | 10 | 7.7   | 1.4  | 10.9 | 3.2  | 18.8  | 3.4  | 8.0   | 1.6  |
| RANOLAZINE DIHYDROCHLORIDE                    | <chem>COc1cccc1OCC(O)CN2CCN(CC(=O)Nc3c(C)cccc3C)CC2.Cl</chem>                                                                                                         | 11 | 28.1  | 2.5  | 36.5 | 4.0  | 44.0  | 9.7  | 25.5  | 1.5  |
| PLATE 2                                       |                                                                                                                                                                       |    |       |      |      |      |       |      |       |      |
| A                                             |                                                                                                                                                                       |    |       |      |      |      |       |      |       |      |
|                                               | <chem>CC1=C(N2[C@H](SC1)[C@H](NC(=O)[C@H](N)c3ccccc3)C2=O)C(=O)O</chem>                                                                                               | 2  | 103.0 | 3.1  | 88.3 | 9.1  | 101.3 | 0.5  | 98.5  | 4.9  |
| TROXIPIDE                                     | <chem>COc1cc(cc(OC)C1OC)C(=O)NC2CCCNC2</chem>                                                                                                                         | 3  | 19.1  | 1.5  | 21.7 | 11.0 | 31.9  | 3.3  | 17.2  | 1.8  |
| LEVOSULPIRIDE                                 | <chem>CCN1CCC[C@H]1CN(C(=O)c2cc(ccc2OC)S(=O)(=O)N</chem>                                                                                                              | 4  | 17.1  | 1.3  | 17.9 | 2.9  | 26.6  | 3.3  | 11.8  | 1.3  |
|                                               | <chem>Cc1nnc2CN=C(c3ccccc3)c4cc(Cl)ccc4-n12</chem>                                                                                                                    | 5  | 55.5  | 5.3  | 63.9 | 7.8  | 63.0  | 1.8  | 41.5  | 4.5  |
| DOCETAXEL                                     | <chem>CC(=O)O[C@]12CO[C@@H]2[C@H](O)[C@]3(C)[C@H]1[C@@H](OC(=O)c4ccccc4)[C@@]5(O)C[C@H](OC(=O)[C@H](O)[C@@H](NC(=O)OC(C)(C)c6ccc cc6)C=C([C@H](O)C3=O)C5(C)C)C</chem> | 6  | 67.4  | 7.8  | 80.0 | 10.5 | 88.9  | 0.0  | 2.7   | 0.1  |
|                                               | <chem>C[C@]1(O)CC[C@H]2[C@@H]3CCC4=CC(=O)CC[C@]4(C)[C@H]3CC[C@@]21C</chem>                                                                                            | 7  | 59.7  | 6.8  | 55.1 | 4.0  | 69.0  | 10.4 | 50.2  | 3.4  |
| 4-CHLORO-N-(2-MORPHOLIN-4-YL-ETHYL) BENZAMIDE | <chem>Clc1ccc(cc1)C(=O)NCCN2CCOCC2</chem>                                                                                                                             | 8  | 83.4  | 1.1  | 77.1 | 4.8  | 89.6  | 3.9  | 73.9  | 3.2  |
| FLUBENDAZOLE                                  | <chem>COC(=O)Nc1nc2cc(ccc2[nH]1)C(=O)c3ccc(F)cc3</chem>                                                                                                               | 9  | 90.8  | 1.5  | 81.3 | 2.0  | 102.8 | 5.0  | 81.0  | 0.5  |

|   |                                                |                                                                                                                                                                                |    |      |     |     |     |      |      |     |     |       |      |     |     |       |      |      |     |
|---|------------------------------------------------|--------------------------------------------------------------------------------------------------------------------------------------------------------------------------------|----|------|-----|-----|-----|------|------|-----|-----|-------|------|-----|-----|-------|------|------|-----|
|   | PICEID                                         | <chem>OC[C@H]1O[C@@H](Oc2cc(O)cc/C=C/c3ccc(O)cc3)c2)[C@H](O)[C@@H](O)[C@@H]1O</chem>                                                                                           | 10 | 81.7 | 0.5 |     |     | 50.3 | 18.2 |     |     | 92.4  | 2.7  |     |     | 69.8  | 2.4  |      |     |
|   | GABEXATE                                       | <chem>CCOC(=O)c1ccc(OC(=O)CCCCN=C(N)N)cc1.CS(=O)(=O)O</chem>                                                                                                                   | 11 | 7.7  | 1.6 | 0.7 | 0.1 | -8.3 | 12.2 | 0.7 | 0.1 | 10.6  | 3.2  | 0.6 | 0.1 | 13.7  | 3.1  | 0.58 | 0.1 |
| B | PIDOTIMOD                                      | <chem>OC(=O)[C@@H]1CSCN1C(=O)[C@@H]2CCCC(=O)N2</chem>                                                                                                                          | 2  | 76.4 | 0.2 |     |     | 82.6 | 12.1 |     |     | 82.9  | 0.3  |     |     | 91.9  | 0.3  |      |     |
|   | ACTARIT                                        | <chem>CC(=O)Nc1ccc(CC(=O)O)cc1</chem>                                                                                                                                          | 3  | 96.9 | 3.8 |     |     | 96.1 | 1.9  |     |     | 114.4 | 6.4  |     |     | 105.2 | 6.4  |      |     |
|   |                                                | <chem>NC1=NC(=O)C(O1)c2cccc2</chem>                                                                                                                                            | 4  | 93.8 | 0.6 |     |     | 84.5 | 4.2  |     |     | 105.9 | 0.2  |     |     | 96.4  | 7.3  |      |     |
|   |                                                | <chem>Nc1nnc(c(N)n1)c2cccc(Cl)c2Cl</chem>                                                                                                                                      | 5  | 47.7 | 0.4 |     |     | 40.1 | 15.0 |     |     | 53.3  | 0.3  |     |     | 45.5  | 1.7  |      |     |
|   | HONOKIOL                                       | <chem>Oc1ccc(cc1CC=C)c2cc(CC=C)ccc2O</chem>                                                                                                                                    | 6  | 80.4 | 3.0 |     |     | 78.8 | 3.2  |     |     | 92.5  | 1.8  |     |     | 74.9  | 6.5  |      |     |
|   | TOSUFLOXACIN TOSILATE                          | <chem>NC1CCN(C1)c2nc3n(cc(C(=O)O)c(=O)c3cc2F)c4ccc(F)cc4F.Cc1ccc(cc1)S(=O)(=O)O</chem>                                                                                         | 7  | 67.6 | 7.1 |     |     | 69.3 | 15.0 |     |     | 100.3 | 3.8  |     |     | 62.1  | 11.3 |      |     |
|   | HALOMETASONE MONOHYDRATE                       | <chem>C[C@@H]1C[C@H]2[C@@H]3C[C@H](F)C4=CC(=O)C(=C[C@]4(C)[C@@]3(F)[C@@H](O)[C@]2(C)[C@@]1(O)C(=O)CO)Cl</chem>                                                                 | 8  | 36.6 | 7.1 |     |     | 34.4 | 9.0  |     |     | 51.1  | 13.4 |     |     | 35.2  | 3.5  |      |     |
|   | TACROLIMUS                                     | <chem>CO[C@@H]1C[C@@H](CC[C@H]1O)/C=C(\C)/[C@H]2OC(=O)[C@@H]3CCCCN3C(=O)C(=O)[C@]4(O)O[C@@H]([C@H](C[C@H]4C)OC)[C@H](C[C@H](C)C(=C[C@H](CC=C)C(=O)C[C@H](O)[C@H]2C)C)OC</chem> | 9  | 26.1 | 3.9 |     |     | 37.0 | 0.8  |     |     | 51.1  | 1.6  |     |     | 31.9  | 0.3  |      |     |
|   | 1-(2-METHYL-5-NITRO-IMIDAZOL-1-YL)-PROPAN-2-OL | <chem>CC(O)Cn1c(C)ncc1[N+](=O)[O-]</chem>                                                                                                                                      | 10 | 96.2 | 4.5 |     |     | 88.7 | 4.4  |     |     | 110.6 | 2.9  |     |     | 97.1  | 5.6  |      |     |
|   | OXICONAZOLE NITRATE                            | <chem>Clc1ccc(CON=C(Cn2ccn2)c3ccc(Cl)cc3Cl)c(Cl)c1.O[N+](=O)[O-]</chem>                                                                                                        | 11 | 94.3 | 2.1 |     |     | 74.4 | 17.9 |     |     | 110.9 | 6.2  |     |     | 100.9 | 5.7  |      |     |
| C | RAMIPRIL                                       | <chem>CCOC(=O)[C@H](CCc1ccccc1)N[C@@H](C)C(=O)N2[C@@H](C[C@@H]3CCC[C@@H]32)C(=O)O</chem>                                                                                       | 2  | 89.5 | 6.6 |     |     | 81.4 | 6.1  |     |     | 106.6 | 1.5  |     |     | 95.4  | 3.8  |      |     |
|   | AZELASTINE HYDROCHLORIDE                       | <chem>CN1CCCC(CC1)n2nc(Cc3ccc(Cl)c3)c4c4cccc4c2=O.Cl</chem>                                                                                                                    | 3  | 13.9 | 0.4 |     |     | 18.7 | 0.2  |     |     | 23.5  | 4.5  |     |     | 19.6  | 1.7  |      |     |
|   | LETROZOLE                                      | <chem>N#Cc1ccc(cc1)C(c2ccc(C#N)cc2)n3cncn3</chem>                                                                                                                              | 4  | 53.2 | 3.9 |     |     | 45.3 | 0.0  |     |     | 54.8  | 0.9  |     |     | 45.5  | 2.1  |      |     |
|   | N-ETHYL-O-CROTONOTOLUIDIDE                     | <chem>CCN(C(=O)/C=C/C)c1cccc1C</chem>                                                                                                                                          | 5  | 89.1 | 4.9 |     |     | 74.5 | 1.2  |     |     | 89.9  | 2.8  |     |     | 96.2  | 5.4  |      |     |



|                                 |                                                                                                                                                                                       |                                                                                                                                                                                          |      |      |     |     |      |       |      |  |       |       |     |  |       |      |     |  |  |
|---------------------------------|---------------------------------------------------------------------------------------------------------------------------------------------------------------------------------------|------------------------------------------------------------------------------------------------------------------------------------------------------------------------------------------|------|------|-----|-----|------|-------|------|--|-------|-------|-----|--|-------|------|-----|--|--|
| TOLTERODINE TARTRATE            | <chem>CC(C)N(CC[C@H](c1ccccc1)c2cc(C)ccc2O)C(C)C.OC(C(O)C(=O)O)C(=O)O</chem>                                                                                                          | 6                                                                                                                                                                                        | 49.8 | 9.3  |     |     | 46.9 | 2.2   |      |  | 62.7  | 3.4   |     |  | 49.6  | 9.7  |     |  |  |
| MECILLINAM                      | <chem>CC1(C)S[C@@H]2[C@H](N=CN3CCCCC3)C(=O)N2[C@H]1C(=O)O</chem>                                                                                                                      | 7                                                                                                                                                                                        | 77.8 | 6.0  |     |     | 80.0 | 10.1  |      |  | 84.3  | 2.6   |     |  | 89.1  | 5.1  |     |  |  |
| TRICLABENDAZOLE                 | <chem>CSc1nc2cc(Cl)c(Oc3cccc(Cl)c3Cl)cc2[nH]1</chem>                                                                                                                                  | 8                                                                                                                                                                                        | 92.5 | 7.4  |     |     | 95.4 | 9.4   |      |  | 102.4 | 2.8   |     |  | 106.2 | 4.2  |     |  |  |
| VALACICLOVIR HYDROCHLORIDE      | <chem>CC(C)[C@H](N)C(=O)OCCOCn1cnc2c(O)nc(N)nc12.Cl</chem>                                                                                                                            | 9                                                                                                                                                                                        | 46.4 | 4.7  |     |     | 46.1 | 4.1   |      |  | 65.8  | 3.5   |     |  | 45.5  | 5.5  |     |  |  |
| <b>NIFEKALANT HYDROCHLORIDE</b> | <chem>Cn1c(NCCN(CCO)CCc2ccc(cc2)[N+](=O)[O-])cc(=O)n(C)c1=O.Cl</chem>                                                                                                                 | 10                                                                                                                                                                                       | 4.3  | 0.7  | 2.9 | 0.1 | 6.0  | 3.9   |      |  | 9.1   | 1.6   |     |  | 10.3  | 0.1  |     |  |  |
| KITASAMYCIN                     | <chem>CO[C@H]1[C@@H](CC(=O)O[C@H](C)CC=CC[C@H](O)[C@H](C)C[C@H](CC=O)[C@@H]1O[C@@H]2O[C@H](C)[C@H](O[C@H]3C[C@@](C)(OC(=O)CC(C)[C@H](O)[C@H](C)O3)[C@@H]([C@H]2O)N(C)C)OC(=O)C</chem> | 11                                                                                                                                                                                       | 27.2 | 2.4  |     |     | 31.2 | 0.5   |      |  | 44.8  | 5.5   |     |  | 27.5  | 0.2  |     |  |  |
| <b>D</b>                        | FENPIVERINIUM BROMIDE                                                                                                                                                                 | <chem>C[N+](C)(CCC(C(=O)N)(c2ccccc2)c3ccccc3)CCCC1.[Br-]</chem>                                                                                                                          | 2    | 48.6 | 6.5 |     |      | 52.6  | 3.4  |  |       | 74.0  | 3.6 |  |       | 45.8 | 3.8 |  |  |
|                                 | TOCAINIDE                                                                                                                                                                             | <chem>CC(N)C(=O)Nc1c(C)cccc1C</chem>                                                                                                                                                     | 3    | 89.2 | 2.4 |     |      | 81.3  | 7.8  |  |       | 103.5 | 1.5 |  |       | 86.0 | 4.0 |  |  |
|                                 | MEROPENEM                                                                                                                                                                             | <chem>C[C@@H](O)[C@@H]1[C@H]2[C@@H](C)C(=C(N2C1=O)C(=O)O)S[C@@H]3CN[C@@H](C3)C(=O)N(C)C</chem>                                                                                           | 4    | 72.0 | 4.3 |     |      | 102.0 | 8.7  |  |       | 86.8  | 0.3 |  |       | 77.1 | 5.0 |  |  |
|                                 | AMFEBUTAMONE                                                                                                                                                                          | <chem>CC(NC(C)(C)C(=O)c1cccc(Cl)c1</chem>                                                                                                                                                | 5    | 52.9 | 3.5 |     |      | 51.1  | 6.3  |  |       | 46.8  | 1.0 |  |       | 45.8 | 0.8 |  |  |
|                                 | CARMOFUR                                                                                                                                                                              | <chem>CCCCCNC(=O)n1cc(F)c(=O)[nH]c1=O</chem>                                                                                                                                             | 6    | 90.7 | 5.7 |     |      | 74.9  | 6.0  |  |       | 97.7  | 0.8 |  |       | 85.6 | 2.9 |  |  |
|                                 | ATOMOXETINE HYDROCHLORIDE                                                                                                                                                             | <chem>CNCC[C@@H](Oc1cccc1C)c2ccccc2.Cl</chem>                                                                                                                                            | 7    | 69.8 | 5.4 |     |      | 75.3  | 3.0  |  |       | 77.7  | 4.4 |  |       | 68.1 | 7.2 |  |  |
|                                 | ROFECOXIB                                                                                                                                                                             | <chem>CS(=O)(=O)c1ccc(cc1)C2=C(C(=O)OC2)c3ccccc3</chem>                                                                                                                                  | 8    | 48.0 | 1.1 |     |      | 18.5  | 6.5  |  |       | 65.5  | 1.3 |  |       | 35.5 | 0.4 |  |  |
|                                 | CLARITHROMYCIN                                                                                                                                                                        | <chem>CC[C@H]1OC(=O)[C@H](C)[C@@H](O)[C@H]2C[C@@](C)(OC[C@@H](O)[C@H](C)O2)[C@H](C)[C@@H](O)[C@@H]3O[C@H](C)[C@H]([C@H]3O)N(C)[C@@](C)(C[C@H](C)C(=O)[C@H](C)[C@H](O)[C@]1(C)O)OC</chem> | 9    | 86.5 | 6.4 |     |      | 89.1  | 10.1 |  |       | 93.5  | 1.8 |  |       | 73.9 | 1.4 |  |  |

|   |                                                  |                                                                                                  |      |      |      |      |      |  |      |      |      |      |      |       |     |      |      |      |      |      |     |
|---|--------------------------------------------------|--------------------------------------------------------------------------------------------------|------|------|------|------|------|--|------|------|------|------|------|-------|-----|------|------|------|------|------|-----|
| E | NATEGLINIDE                                      | <chem>CC(C)[C@H]1CC[C@@H](CC1)C(=O)N[C@H](Cc2ccccc2)C(=O)O</chem>                                | 10   | 89.1 | 6.1  |      |      |  |      | 77.5 | 7.0  |      |      | 102.0 | 4.9 |      |      | 84.8 | 2.3  |      |     |
|   | FAMCICLOVIR                                      | <chem>CC(=O)OCC(Cc1cnc2cnc(N)nc12)COC(=O)C</chem>                                                | 11   | 82.7 | 4.3  |      |      |  |      | 79.0 | 7.1  |      |      | 103.7 | 7.6 |      |      | 80.0 | 3.6  |      |     |
|   | 19-NORTESTOSTERONE                               | <chem>C[C@H]12CC[C@H]3[C@@H](CCC4=CC(=O)CC[C@H]34)[C@@H]2CC[C@H]1O</chem>                        | 2    | 17.2 | 2.3  |      |      |  |      | 24.4 | 0.8  |      |      | 22.1  | 2.1 |      |      | 17.0 | 0.2  |      |     |
|   | TAXIFOLIN-(+/-)                                  | <chem>O[C@H]1[C@H](Oc2cc(O)cc(O)c2C1=O)c3ccc(O)c(O)c3</chem>                                     | 3    | 53.8 | 3.4  |      |      |  |      | 58.1 | 5.7  |      |      | 72.4  | 1.8 |      |      | 62.2 | 1.2  |      |     |
|   | ORLISTAT                                         | <chem>CCCCCCCC[C@H](C[C@@H]1OC(=O)[C@H]1CCCCC)OC(=O)[C@H](CC(C)C)NC=O</chem>                     | 4    | 82.8 | 4.2  |      |      |  |      | 78.7 | 0.4  |      |      | 85.6  | 1.1 |      |      | 79.7 | 0.9  |      |     |
|   | ALFUZOSIN                                        | <chem>COc1cc2nc(nc(N)c2cc1OC)N(C)CCCNC(=O)C3CCCO3</chem>                                         | 5    | 18.7 | 4.1  |      |      |  |      | 19.7 | 1.5  |      |      | 30.6  | 3.1 |      |      | 16.7 | 1.8  |      |     |
|   | PAROXETINE                                       | <chem>CN1CC[C@H]([C@H](COc2ccc3OCOc3c2)C1)c4ccc(F)cc4</chem>                                     | 6    | 56.3 | 6.8  |      |      |  |      | 56.8 | 3.6  |      |      | 69.2  | 2.9 |      |      | 66.8 | 8.7  |      |     |
|   | ARTESUNATE                                       | <chem>C[C@@H]1CC[C@H]2[C@@H](C)[C@@H](OC(=O)CCC(=O)O)[C@@H]3O[C@@]4(C)CC[C@@H]1[C@@]23OO4</chem> | 7    | 74.9 | 1.1  |      |      |  |      | 88.2 | 3.0  |      |      | 84.8  | 1.9 |      |      | 76.8 | 2.9  |      |     |
|   | BISOPROLOL FUMARATE                              | <chem>CC(C)NCC(O)COc1ccc(COCCOC(C)C)cc1.OC(=O)/C=C/C(=O)O</chem>                                 | 8    | 40.4 | 6.5  |      |      |  |      | 40.8 | 1.5  |      |      | 55.0  | 3.4 |      |      | 36.5 | 2.8  |      |     |
|   | ARIPIPIRAZOLE                                    | <chem>Clc1cccc(N2CCN(CCCOC3ccc4CCC(=O)Nc4c3)CC2)c1Cl</chem>                                      | 9    | 44.9 | 6.9  |      |      |  |      | 29.3 | 10.7 |      |      | 76.9  | 6.1 |      |      | 50.3 | 14.2 |      |     |
|   |                                                  | <chem>CC(=O)O[C@@]1(CC[C@H]2[C@@H]3C=C(C)C4=CC(=O)CC[C@]4(C)[C@H]3CC[C@@]21C)C(=O)C</chem>       | 10   | 50.2 | 12.5 |      |      |  |      | 68.8 | 7.6  |      |      | 71.7  | 2.0 |      |      | 55.4 | 4.7  |      |     |
|   | <chem>CC(C)NCC(O)c1ccc(NS(=O)(=O)C)cc1.Cl</chem> | 11                                                                                               | 75.0 | 5.6  |      |      |      |  | 71.8 | 6.6  |      |      | 88.4 | 2.8   |     |      | 78.0 | 6.4  |      |      |     |
| F |                                                  | <chem>CN/C=C/[N+](=O)[O-])/NCCSCc1csc(CN(C)C)n1</chem>                                           | 2    | 36.0 | 4.7  |      |      |  |      | 42.3 | 3.9  |      |      | 52.6  | 5.6 |      |      | 36.9 | 2.5  |      |     |
|   | LEVOFLOXACIN                                     | <chem>C[C@H]1COc2c(N3CCN(C)CC3)c(F)cc4c(=O)c(cn1c24)C(=O)O</chem>                                | 3    | 34.0 | 4.5  | 71.5 | 10.5 |  |      | 33.5 | 0.2  | 35.0 | 9.9  | 54.0  | 4.9 | 90.5 | 10.9 | 24.5 | 2.3  | 45.8 | 2.9 |
|   |                                                  | <chem>Cc1nccn1CC2CCc3c(C2=O)c4ccc(cc4n3)Cl</chem>                                                | 4    | -1.7 | 1.2  |      |      |  |      | -4.4 | 13.3 |      |      | -0.7  | 0.7 |      |      | 1.5  | 1.8  |      |     |
|   | AMISULPRIDE                                      | <chem>CCN1CCCC1CNC(=O)c2cc(c(N)c2OC)S(=O)(=O)CC</chem>                                           | 5    | 4.8  | 1.2  |      |      |  |      | -4.6 | 10.3 |      |      | 9.0   | 3.1 |      |      | 3.0  | 0.2  |      |     |
|   | OLMESARTAN MEDOXOMIL                             | <chem>CCCc1nc(c(C(=O)O)n1Cc2ccc(cc2)c3ccccc3c4nn[nH]n4)C(C)(C)O</chem>                           | 6    | 66.7 | 3.8  |      |      |  |      | 76.7 | 1.6  |      |      | 83.0  | 0.2 |      |      | 70.6 | 1.2  |      |     |

|   |                              |                                                                                               |    |      |      |  |  |  |  |       |      |  |  |  |  |       |      |  |  |      |      |
|---|------------------------------|-----------------------------------------------------------------------------------------------|----|------|------|--|--|--|--|-------|------|--|--|--|--|-------|------|--|--|------|------|
|   |                              | <chem>CCC(C)n1ncn(c2ccc(cc2)N3CCN(CC3)c4ccc(OCC5COC(Cn6cncn6)(O5)c7ccc(Cl)cc4)c1=O</chem>     | 7  | 73.3 | 5.1  |  |  |  |  | 80.2  | 13.2 |  |  |  |  | 82.7  | 7.5  |  |  | 76.0 | 7.3  |
|   | EZETIMIBE                    | <chem>O[C@@H](CC[C@H]1[C@H](N(C1=O)c2ccc(F)cc2)c3ccc(O)cc3)c4ccc(F)cc4</chem>                 | 8  | 54.2 | 1.4  |  |  |  |  | 48.7  | 3.9  |  |  |  |  | 62.4  | 4.8  |  |  | 40.8 | 1.5  |
|   | TRIMEBUTINE MALEATE          | <chem>CCC(COC(=O)c1cc(OC)c(OC)c(O)C)c1(N(C)C)c2ccccc2.OC(=O)/C=C\C(=O)O</chem>                | 9  | 28.4 | 4.7  |  |  |  |  | 39.2  | 9.9  |  |  |  |  | 35.9  | 8.0  |  |  | 29.8 | 6.1  |
|   | ORMETOPRIM                   | <chem>COc1cc(C)c(Cc2cnc(N)nc2N)cc1OC</chem>                                                   | 10 | 3.9  | 0.7  |  |  |  |  | -24.7 | 6.3  |  |  |  |  | 5.4   | 0.5  |  |  | 8.1  | 13.5 |
|   | RUFLOXACIN MONOHYDROCHLORIDE | <chem>CN1CCN(CC1)c2c(F)cc3c(=O)c(cn4CCSc2c43)C(=O)O</chem>                                    | 11 | 30.9 | 3.9  |  |  |  |  | 33.2  | 7.6  |  |  |  |  | 52.8  | 6.3  |  |  | 29.4 | 4.4  |
| G |                              | <chem>Nc1nc(O)ncc1F</chem>                                                                    | 2  | 96.3 | 5.1  |  |  |  |  | 86.9  | 6.8  |  |  |  |  | 97.1  | 4.3  |  |  | 88.9 | 1.6  |
|   | CEFATRIZINE PROPYLENE GLYCOL | <chem>N[C@@H](C(=O)N[C@H]1[C@H]2SCC(=C(N2C1=O)C(=O)O)CS)c3c[nH]nn3)c4ccc(O)cc4.CC(O)CO</chem> | 3  | 94.4 | 1.9  |  |  |  |  | 93.9  | 8.0  |  |  |  |  | 103.2 | 12.1 |  |  | 86.2 | 0.9  |
|   |                              | <chem>CC[C@@]12CC[C@H]3[C@@H](CCC4=CC(=O)CC[C@H]34)[C@@H]2CC[C@]1(O)C#C</chem>                | 4  | 88.9 | 0.8  |  |  |  |  | 89.6  | 0.9  |  |  |  |  | 88.8  | 2.2  |  |  | 73.0 | 1.5  |
|   | LOFEPRAMINE                  | <chem>CN(CCCN1c2ccccc2CCc3ccccc13)CC(=O)c4ccc(Cl)cc4.Cl</chem>                                | 5  | 34.7 | 6.8  |  |  |  |  | 29.4  | 12.8 |  |  |  |  | 42.5  | 11.9 |  |  | 26.0 | 6.0  |
|   | LOSARTAN POTASSIUM           | <chem>CCCCc1nc(Cl)c(CO)n1Cc2ccc(cc2)c3ccccc3c4nnn[n-]4.[K+]</chem>                            | 6  | 79.4 | 5.6  |  |  |  |  | 64.6  | 0.7  |  |  |  |  | 91.9  | 0.9  |  |  | 74.7 | 3.4  |
|   | CEFPODOXIME PROXETIL         | <chem>COCC1=C(N2[C@H](SC1)[C@H](NC(=O)C(=NOC)c3csc(N)n3)C2=O)C(=O)OC(C)OC(=O)OC(C)C</chem>    | 7  | 45.1 | 5.1  |  |  |  |  | 44.0  | 5.0  |  |  |  |  | 60.4  | 0.7  |  |  | 44.4 | 9.6  |
|   | TIAGABINE HCL                | <chem>Cc1ccsc1C(=CCCN2CCC[C@H](C2)C(=O)O)c3sccc3C.Cl</chem>                                   | 8  | 77.5 | 1.4  |  |  |  |  | 75.8  | 13.0 |  |  |  |  | 91.6  | 4.8  |  |  | 66.6 | 1.9  |
|   |                              | <chem>C[C@]1(O)CC[C@H]2[C@@H]3CC[C@H]4CC(=O)CC[C@]4(C)[C@H]3CC[C@@]21C</chem>                 | 9  | 69.0 | 0.4  |  |  |  |  | 63.3  | 3.6  |  |  |  |  | 90.8  | 4.7  |  |  | 76.2 | 4.8  |
|   | ZILEUTON                     | <chem>CC(N(O)C(=O)N)c1cc2ccccc2s1</chem>                                                      | 10 | 98.7 | 6.0  |  |  |  |  | 92.1  | 12.0 |  |  |  |  | 102.3 | 1.1  |  |  | 76.9 | 9.6  |
|   | TAXIFOLIN-(+)                | <chem>O[C@@H]1[C@H](Oc2cc(O)cc(O)c2C1=O)c3ccc(O)c(O)c3</chem>                                 | 11 | 71.8 | 2.8  |  |  |  |  | 63.6  | 3.5  |  |  |  |  | 83.0  | 5.8  |  |  | 55.6 | 2.0  |
| H |                              | <chem>NC(=O)N1c2ccccc2CC(=O)c3ccc cc13</chem>                                                 | 2  | 89.3 | 0.0  |  |  |  |  | 85.2  | 1.7  |  |  |  |  | 89.3  | 8.6  |  |  | 80.3 | 5.0  |
|   | IDEBENONE                    | <chem>COC1=C(OC)C(=O)C(=C(C)C1=O)CCCCCCCCO</chem>                                             | 3  | 29.3 | 11.0 |  |  |  |  | 31.0  | 12.3 |  |  |  |  | 31.9  | 6.8  |  |  | 28.3 | 8.6  |

|                                    |                                                                                                               |    |       |      |      |      |       |     |      |      |       |      |      |      |       |      |      |      |
|------------------------------------|---------------------------------------------------------------------------------------------------------------|----|-------|------|------|------|-------|-----|------|------|-------|------|------|------|-------|------|------|------|
| CETRAXATE HCL                      | <chem>NC[C@H]1CC[C@@H](CC1)C(=O)Oc2ccc(CCC(=O)O)cc2.Cl</chem>                                                 | 4  | 101.0 | 3.1  |      |      | 98.4  | 4.2 |      |      | 104.1 | 1.6  |      |      | 91.0  | 1.1  |      |      |
| PEROSPIRONE HCL                    | <chem>O=C1[C@H]2CCCC[C@H]2C(=O)N1CCCN3CCN(CC3)c4nsc5ccc cc45.Cl</chem>                                        | 5  | 3.4   | 0.4  |      |      | 7.5   | 4.5 |      |      | 4.7   | 1.1  |      |      | 4.2   | 0.2  |      |      |
| TEMOZOLOMIDE                       | <chem>Cn1nnc2c(ncn2c1=O)C(=O)N</chem>                                                                         | 6  | 112.3 | 4.6  |      |      | 100.1 | 1.8 |      |      | 106.4 | 3.7  |      |      | 105.0 | 5.5  |      |      |
| BUFLOMEDIL HCL                     | <chem>COc1cc(OC)c(C(=O)CCCN2CCCC 2)c(OC)c1.Cl</chem>                                                          | 7  | 18.6  | 2.8  |      |      | 23.0  | 1.0 |      |      | 28.3  | 4.1  |      |      | 16.3  | 0.0  |      |      |
| IDARUBICIN HYDROCHLORIDE           | <chem>C[C@@H]1O[C@H](C[C@H](N)[C@@H]1O)O[C@H]2C[C@@](O)(Cc3c(O)c4C(=O)c5ccccc5C(=O)c4c(O)c23)C(=O)C.Cl</chem> | 8  | 39.5  | 4.2  |      |      | 39.9  | 8.8 |      |      | 58.8  | 11.1 |      |      | 39.8  | 8.1  |      |      |
| NISOLDIPINE                        | <chem>CO/C=C\C1/C(C(=C(C)N=C1)C(=O)OCC(C)C)c2cccc2[N+](=O)[O-]/O</chem>                                       | 9  | 43.9  | 2.5  |      |      | 50.3  | 5.8 |      |      | 59.3  | 0.8  |      |      | 36.0  | 5.1  |      |      |
|                                    | <chem>Cc1cn([C@@H]2O[C@H](CO)C=C2)c(=O)[nH]c1=O</chem>                                                        | 10 | 98.7  | 2.6  |      |      | 91.2  | 4.2 |      |      | 99.6  | 6.8  |      |      | 86.5  | 1.4  |      |      |
| <b>ALOSETRON MONOHYDROCHLORIDE</b> | <chem>Cc1[nH]cnc1CN2CCc3c(C2=O)c4ccccc4n3C.Cl</chem>                                                          | 11 | -7.2  | 6.1  | 0.1  | 0.0  | 0.4   | 4.6 |      |      | 0.8   | 0.0  |      |      | -1.7  | 4.8  |      |      |
| PLATE 3                            |                                                                                                               |    |       |      |      |      |       |     |      |      |       |      |      |      |       |      |      |      |
| <b>A</b> BESTATIN                  | <chem>CC(C)C[C@H](NC(=O)[C@@H](O)[C@H](N)Cc1ccccc1)C(=O)O</chem>                                              | 2  | 93.7  | 5.7  |      |      | 104.3 | 0.2 |      |      | 99.3  | 0.9  |      |      | 130.4 | 2.1  |      |      |
| <b>16502-01-5 (TRYPTOLINE)</b>     | <chem>C1Cc2c(CN1)[nH]c3ccccc23</chem>                                                                         | 3  | 33.6  | 3.6  | 103  | 10.4 | 39.3  | 1.9 | 143  | 27.5 | 27.4  | 1.3  | 110  | 13.6 | 1.1   | 0.0  | 95.6 | 11.7 |
|                                    | <chem>COc1cc(C)nn1c2nc(C)cc(OC)n2</chem>                                                                      | 4  | 93.0  | 5.4  |      |      | 63.7  | 2.0 |      |      | 99.0  | 1.4  |      |      | 134.0 | 3.3  |      |      |
| HOMOVERATRYLAMINE                  | <chem>COc1ccc(CCN)cc1OC</chem>                                                                                | 5  | 51.5  | 1.2  |      |      | 53.9  | 0.6 |      |      | 36.2  | 1.8  |      |      | 76.8  | 4.6  |      |      |
|                                    | <chem>C[C@H](CCC(=O)O)[C@H]1CC[C@H]2[C@H]3[C@H](CC(=O)[C@@]12C)[C@@]4(C)CCC(=O)C[C@H]4CC3=O</chem>            | 6  | 88.8  | 1.4  |      |      | 71.5  | 1.9 |      |      | 98.3  | 3.8  |      |      | 122.6 | 5.4  |      |      |
|                                    | <chem>C[C@H]1C[C@H]2[C@@H]3CC[C@](O)(C(=O)C)[C@@]3(C)CC[C@H]2[C@@]4(C)CCC(=O)C=C14</chem>                     | 7  | 59.0  | 14.1 |      |      | 79.2  | 2.0 |      |      | 65.0  | 8.2  |      |      | 72.0  | 5.0  |      |      |
| <b>NAFADOTRIDE</b>                 | <chem>CCCCN1CCCC1CNC(=O)c2cc(C#N)c3ccccc3c2OC</chem>                                                          | 8  | 16.0  | 4.4  | 11.5 | 1.0  | 19.4  | 1.8 | 10.4 | 2.0  | 18.8  | 3.8  | 19.9 | 1.4  | 30.7  | 13.0 | 7.3  | 0.6  |

|          |                                                                                                                     |                                                                                                   |    |      |      |      |     |  |  |      |     |      |      |  |       |     |     |      |       |      |      |     |
|----------|---------------------------------------------------------------------------------------------------------------------|---------------------------------------------------------------------------------------------------|----|------|------|------|-----|--|--|------|-----|------|------|--|-------|-----|-----|------|-------|------|------|-----|
|          | METHANESULFONAMIDE, N-[4-[[1-[2-(6-METHYL-2-PYRIDINYL)ETHYL]-4-PIPERIDINYL]CARBONYL]PHENYL]-, DIHYDROCHLORIDE [CAS] | <chem>Cc1cccc(CCN2CCC(CC2)C(=O)c3ccc(NS(=O)(=O)C)cc3)n1.Cl</chem>                                 | 9  | 16.7 | 2.8  |      |     |  |  | 45.6 | 5.5 |      |      |  | 21.4  | 0.2 |     |      | 1.0   | 0.4  |      |     |
|          | TRAMADOL                                                                                                            | <chem>COc1cccc(c1)[C@@]2(O)CCCC[C@@H]2CN(C)C.Cl</chem>                                            | 10 | 70.9 | 9.2  |      |     |  |  | 68.8 | 0.1 |      |      |  | 82.1  | 4.0 |     |      | 73.2  | 5.8  |      |     |
|          | <b>CORTISONE</b>                                                                                                    | <chem>C[C@@]12CC(=O)[C@H]3[C@@H](CCC4=CC(=O)CC[C@]34C)[C@@H]2CC[C@]1(O)C(=O)CO</chem>             | 11 | 49.2 | 5.4  | 56.9 | 6.5 |  |  | 49.0 | 2.5 | 77.4 | 11.2 |  | 55.6  | 1.2 | 131 | 13.3 | 45.8  | 3.3  | 28.5 | 2.8 |
| <b>B</b> | TOREMIFENE CITRATE                                                                                                  | <chem>CN(C)CCOc1ccc(cc1)/C(=C(/CCC)\c2ccccc2)/c3ccccc3.OC(=O)CC(O)(CC(=O)O)C(=O)O</chem>          | 2  | 68.7 | 7.5  |      |     |  |  | 80.2 | 2.2 |      |      |  | 79.3  | 5.5 |     |      | 87.7  | 1.6  |      |     |
|          |                                                                                                                     | <chem>OCCN1CCN(CCCN2c3ccccc3Sc4ccc(cc24)C(F)(F)CC1.Cl</chem>                                      | 3  | 10.1 | 2.5  |      |     |  |  | 10.9 | 2.9 |      |      |  | 15.4  | 2.6 |     |      | 1.1   | 0.1  |      |     |
|          |                                                                                                                     | <chem>OC[C@H]1O[C@H]([C@H](O)[C@@H]1O)n2ncc(=O)[nH]c2=O</chem>                                    | 4  | 93.3 | 1.1  |      |     |  |  | 90.6 | 2.6 |      |      |  | 104.9 | 0.6 |     |      | 108.6 | 14.8 |      |     |
|          |                                                                                                                     | <chem>CCS(=O)(=O)CCn1c(C)ncc1[N+](=O)[O-]</chem>                                                  | 5  | 94.7 | 2.4  |      |     |  |  | 92.7 | 0.7 |      |      |  | 88.7  | 1.5 |     |      | 118.5 | 11.7 |      |     |
|          |                                                                                                                     | <chem>N[C@@H](C(=O)N[C@H]1[C@H]2SCC(=C(N2C1=O)C(=O)O)Cl)c3ccccc3</chem>                           | 6  | 95.1 | 8.5  |      |     |  |  | 89.7 | 0.1 |      |      |  | 101.1 | 0.2 |     |      | 109.2 | 6.0  |      |     |
|          | PINACIDIL MONOHYDRATE                                                                                               | <chem>CC(N=C(NC#N)Nc1ccncc1)C(C)C.O</chem>                                                        | 7  | 73.9 | 0.9  |      |     |  |  | 71.2 | 2.9 |      |      |  | 76.5  | 2.5 |     |      | 82.8  | 11.3 |      |     |
|          |                                                                                                                     | <chem>C[C@@H]1C[C@H]2[C@@H]3CCC4=CC(=O)C=C[C@]4(C)[C@@]3(F)[C@@H](O)C[C@]2(C)[C@H]1C(=O)CO</chem> | 8  | 40.3 | 4.8  |      |     |  |  | 42.8 | 2.5 |      |      |  | 55.9  | 3.0 |     |      | 45.3  | 9.4  |      |     |
|          | 2H-INDOL-2-ONE, 1,3-DIHYDRO-1-PHENYL-3,3-BIS(4-PYRIDINYLMETHYL)- [CAS]                                              | <chem>O=C1N(c2ccccc2C1(Cc3ccncc3)Cc4ccncc4)c5ccccc5.O.Cl</chem>                                   | 9  | 37.0 | 2.2  |      |     |  |  | 36.9 | 1.7 |      |      |  | 52.3  | 1.1 |     |      | 34.5  | 8.1  |      |     |
|          | CHLORDIAZEPOXIDE                                                                                                    | <chem>CNC1=Nc2ccc(Cl)cc2C(=[N+])([O-])C1c3ccccc3</chem>                                           | 10 | 72.9 | 5.7  |      |     |  |  | 81.8 | 2.6 |      |      |  | 78.8  | 7.3 |     |      | 90.0  | 10.8 |      |     |
|          |                                                                                                                     | <chem>CN1CCC(=C2c3ccccc3C=Cc4cccc24)CC1.Cl</chem>                                                 | 11 | 69.9 | 11.1 |      |     |  |  | 89.6 | 0.6 |      |      |  | 68.2  | 6.2 |     |      | 76.1  | 4.8  |      |     |

|                                |                             |                                                                                                                                                                                                 |                                                                |       |      |      |     |       |      |      |     |       |      |      |     |       |      |      |     |
|--------------------------------|-----------------------------|-------------------------------------------------------------------------------------------------------------------------------------------------------------------------------------------------|----------------------------------------------------------------|-------|------|------|-----|-------|------|------|-----|-------|------|------|-----|-------|------|------|-----|
| <b>C</b>                       | GOSERELIN ACETATE           | <chem>CC(C)CC(NC(=O)C(COC(C)(C)N)C(=O)C(Cc1ccc(O)cc1)NC(=O)C(CO)NC(=O)C(Cc2c[nH]c3cccc23)NC(=O)C(Cc4c[nH]cn4)NC(=O)C5CCC(=O)N5)C(=O)N[C@@H](CCCN=C(N)N)C(=O)N6CCCC6C(=O)NNC(=O)N.CC(=O)O</chem> | 2                                                              | 67.9  | 2.3  |      |     | 65.3  | 0.4  |      |     | 94.7  | 2.6  |      |     | 69.5  | 8.0  |      |     |
|                                | PALONOSETRON HYDROCHLORIDE  | <chem>O=C1N(C[C@H]2CCc3cccc1c23)[C@@H]4CN5CCC4CC5.Cl</chem>                                                                                                                                     | 3                                                              | 10.2  | 6.0  |      |     | 2.6   | 0.2  |      |     | 3.8   | 1.0  |      |     | 18.6  | 11.4 |      |     |
|                                | REICHSTEINS SUBSTANCES      | <chem>CC12CCC3C(CCC4=CC(=O)CCC34C)C2CCC1(O)C(=O)CO</chem>                                                                                                                                       | 4                                                              | 48.5  | 3.2  |      |     | 44.1  | 0.7  |      |     | 54.7  | 1.4  |      |     | 44.9  | 7.3  |      |     |
|                                | XANTHINOL NICOTINATE        | <chem>CN(CCO)CC(O)Cn1cnc2n(C)c(=O)n(C)c(=O)c12.OC(=O)c1cccnc1</chem>                                                                                                                            | 5                                                              | 81.2  | 0.1  |      |     | 71.4  | 1.1  |      |     | 84.3  | 3.0  |      |     | 74.2  | 7.3  |      |     |
|                                |                             | <chem>C(c1cccc1)n2ccnc2</chem>                                                                                                                                                                  | 6                                                              | 41.6  | 0.6  |      |     | 41.4  | 0.4  |      |     | 35.4  | 0.3  |      |     | 46.3  | 5.1  |      |     |
|                                |                             | <chem>[O-][N+](=O)c1cccc2c[nH]nc12</chem>                                                                                                                                                       | 7                                                              | 101.7 | 3.1  |      |     | 113.2 | 7.3  |      |     | 99.3  | 1.4  |      |     | 127.6 | 11.8 |      |     |
|                                | DEXCHLORPHENIRAMINE MALEATE | <chem>CN(C)CC[C@@H](c1ccc(Cl)cc1)c2ccccn2.OC(=O)/C=C/C(=O)O</chem>                                                                                                                              | 8                                                              | 70.0  | 1.0  |      |     | 59.5  | 5.8  |      |     | 65.7  | 2.1  |      |     | 77.4  | 6.8  |      |     |
|                                | BECLOMETHASONE              | <chem>CC1CC2C3CCC4=CC(=O)C=CC4(C)[C@@]3(Cl)C(O)CC2(C)C1(O)C(=O)CO</chem>                                                                                                                        | 9                                                              | 57.8  | 4.2  |      |     | 62.1  | 0.0  |      |     | 70.3  | 5.0  |      |     | 58.6  | 7.6  |      |     |
|                                | CEFIXIME TRIHYDRATE         | <chem>Nc1nc(cs1)C(=NOCC(=O)O)C(=O)N[C@H]2[C@H]3SCC(=C(N3C2=O)C(=O)O)C=C.O</chem>                                                                                                                | 10                                                             | 105.2 | 2.9  |      |     | 100.7 | 0.9  |      |     | 100.7 | 4.1  |      |     | 128.8 | 17.2 |      |     |
|                                | HOMOHARRINGTONINE           | <chem>COC(=O)C[C@](O)(CCCC(C)C)O)C(=O)O[C@H]1[C@H]2c3cc4OCO4cc3CCN5CCC[C@]25C=C1OC</chem>                                                                                                       | 11                                                             | 89.0  | 0.5  |      |     | 101.7 | 2.4  |      |     | 99.9  | 2.0  |      |     | 96.7  | 18.8 |      |     |
|                                | <b>D</b>                    | SECOISOLARICIREBINOL                                                                                                                                                                            | <chem>COc1cc(C[C@@H](CO)[C@H](CO)Cc2ccc(O)c(OC)c2)ccc1O</chem> | 2     | 72.5 | 0.7  |     |       | 64.5 | 1.3  |     |       | 81.1 | 0.1  |     |       | 81.5 | 6.9  |     |
| NAPROXEN SODIUM                |                             | <chem>COc1ccc2cc(ccc2c1)[C@H](C)C(=O)[O-].[Na+]</chem>                                                                                                                                          | 3                                                              | 96.5  | 6.3  |      |     | 85.3  | 0.1  |      |     | 98.2  | 0.1  |      |     | 107.4 | 8.9  |      |     |
| 3-PYRIDINEMETHANOL             |                             | <chem>OCc1cccn1</chem>                                                                                                                                                                          | 4                                                              | 92.3  | 2.8  |      |     | 103.5 | 1.4  |      |     | 114.0 | 2.0  |      |     | 107.8 | 3.8  |      |     |
| SYNEPHRINE                     |                             | <chem>CNCC(O)c1ccc(O)cc1</chem>                                                                                                                                                                 | 5                                                              | 97.4  | 3.7  |      |     | 88.4  | 2.5  |      |     | 97.0  | 2.5  |      |     | 105.2 | 16.7 |      |     |
| DULOXETINE HYDROCHLORIDE       |                             | <chem>CNCC[C@H](Oc1cccc2cccc12)c3cccs3.Cl</chem>                                                                                                                                                | 6                                                              | 80.3  | 4.2  |      |     | 76.3  | 0.1  |      |     | 88.3  | 12.0 |      |     | 74.6  | 1.0  |      |     |
|                                |                             | <chem>COc1ccc2[nH]cc(CCN)c2c1</chem>                                                                                                                                                            | 7                                                              | 57.4  | 4.4  |      |     | 5.6   | 2.8  |      |     | 62.0  | 3.4  |      |     | 65.6  | 17.4 |      |     |
| GUANIDINE                      |                             | <chem>CCC(C)(C)NC(=NC#N)Nc1cccn1</chem>                                                                                                                                                         | 8                                                              | 97.5  | 2.6  |      |     | 95.0  | 2.6  |      |     | 101.5 | 1.0  |      |     | 106.6 | 9.8  |      |     |
| <b>73590-58-6 (OMEPRAZOLE)</b> |                             | <chem>COc1ccc2[nH]c(nc2c1)S(=O)Cc3ncc(C)c(OC)c3C</chem>                                                                                                                                         | 9                                                              | 38.5  | 2.2  | 19.8 | 2.9 | 49.5  | 1.9  | 17.2 | 2.7 | 45.1  | 3.0  | 23.5 | 2.5 | 52.1  | 4.9  | 16.1 | 1.1 |

|                                                    |                          |                                                                                                                                 |                                                           |       |      |     |      |       |      |     |      |       |      |     |      |       |      |     |      |
|----------------------------------------------------|--------------------------|---------------------------------------------------------------------------------------------------------------------------------|-----------------------------------------------------------|-------|------|-----|------|-------|------|-----|------|-------|------|-----|------|-------|------|-----|------|
|                                                    |                          | <chem>Nc1nc(cs1)C(=NO)C(=O)N[C@H]2[C@H](3SCC(=C(N3C2=O)C(=O)O)C=C</chem>                                                        | 10                                                        | 111.0 | 9.5  |     |      | 102.3 | 0.7  |     |      | 121.2 | 3.9  |     |      | 140.4 | 12.5 |     |      |
| 50-22-6                                            |                          | <chem>C[C@@]12C[C@H](O)[C@H]3[C@@H](CCC4=CC(=O)CC[C@]34C)[C@@H]2CC[C@@H]1C(=O)CO</chem>                                         | 11                                                        | 53.6  | 4.8  |     |      | 52.3  | 2.4  |     |      | 59.9  | 0.0  |     |      | 55.2  | 16.5 |     |      |
| E                                                  | RALTITREXED              | <chem>CN(Cc1ccc2nc(C)nc(O)c2c1)c3cc(s3)C(=O)N[C@@H](CCC(=O)O)C(=O)O</chem>                                                      | 2                                                         | 49.9  | 1.1  |     |      | 43.0  | 0.1  |     |      | 61.1  | 3.1  |     |      | 52.3  | 5.4  |     |      |
|                                                    |                          | <chem>CN1CCCC1C(=O)Nc2c(C)cccc2C.Cl</chem>                                                                                      | 3                                                         | 83.2  | 6.0  |     |      | 65.8  | 2.4  |     |      | 81.5  | 2.1  |     |      | 79.4  | 9.6  |     |      |
|                                                    | HALOPERIDOL              | <chem>OC1(CCN(CCCC(=O)c2ccc(F)cc2)CC1)c3ccc(Cl)cc3.Cl</chem>                                                                    | 4                                                         | 46.2  | 5.3  |     |      | 47.2  | 2.6  |     |      | 47.0  | 3.9  |     |      | 58.8  | 4.3  |     |      |
|                                                    | 501-36-0                 | <chem>Oc1ccc(/C=C/c2cc(O)cc(O)c2)cc1</chem>                                                                                     | 5                                                         | 88.9  | 13.2 |     |      | 57.6  | 1.5  |     |      | 80.2  | 2.0  |     |      | 96.3  | 21.1 |     |      |
|                                                    | VARDENAFIL CITRATE       | <chem>CCCC1nc(C)c2c(O)nc(nn12)c3cc(ccc3OCC)S(=O)(=O)N4CCN(CC)CC4.Oc(=O)CC(O)(CC(=O)O)C(=O)O</chem>                              | 6                                                         | 74.0  | 7.3  |     |      | 54.1  | 0.2  |     |      | 43.0  | 9.6  |     |      | 44.7  | 8.3  |     |      |
|                                                    | 92-84-2                  | <chem>N1c2cccc2Sc3cccc13</chem>                                                                                                 | 7                                                         | 93.1  | 9.5  |     |      | 80.6  | 1.3  |     |      | 91.0  | 3.9  |     |      | 129.4 | 27.3 |     |      |
|                                                    | L-694,247                | <chem>CS(=O)(=O)Nc1ccc(Cc2noc(n2)c3ccc4[nH]cc(CCN)c4c3)cc1.O</chem>                                                             | 8                                                         | -0.4  | 0.5  |     |      | -2.0  | 1.9  |     |      | -0.3  | 0.0  |     |      | 20.6  | 13.9 |     |      |
|                                                    | DOLASETRON MESYLATE      | <chem>O=C(O[C@H]1C[C@H]2C[C@H]3C[C@@H](C1)N2CC3=O)c4c[nH]c5cccc45.CS(=O)(=O)O</chem>                                            | 9                                                         | 22.0  | 4.7  |     |      | 49.5  | 0.7  |     |      | 37.1  | 7.1  |     |      | 22.4  | 2.7  |     |      |
|                                                    | LOFEXIDINE HYDROCHLORIDE | <chem>CC(Oc1c(Cl)cccc1Cl)C2=NCCN2.Cl</chem>                                                                                     | 10                                                        | 6.7   | 2.0  |     |      | 4.0   | 0.3  |     |      | 13.3  | 3.4  |     |      | 9.3   | 0.7  |     |      |
|                                                    | VECURONIUM BROMIDE       | <chem>CC(=O)O[C@H]1[C@H](C[C@H]2[C@@H]3CC[C@H]4[C@H](OC(=O)C)[C@H](C[C@]4(C)[C@H]3CC[C@]12C)N5CCCCC5)[N+](6C)CCCC6.[Br-]</chem> | 11                                                        | 15.0  | 8.1  |     |      | 25.9  | 2.3  |     |      | 32.2  | 1.1  |     |      | 0.7   | 0.0  |     |      |
|                                                    | F                        | DOXAPRAM HYDROCHLORIDE                                                                                                          | <chem>CCN1CC(CCN2CCOCC2)C(C1=O)(c3cccc3)c4cccc4.Cl</chem> | 2     | 74.1 | 4.4 |      |       | 49.7 | 0.7 |      |       | 64.7 | 2.7 |      |       | 55.9 | 5.3 |      |
| 3-[3,5-DIBROMO-4-HYDROXYBENZOYL]-2-ETHYLBENZOFURAN |                          | <chem>CCc1oc2cccc2c1C(=O)c3cc(Br)c(O)c(Br)c3</chem>                                                                             | 3                                                         | 71.0  | 3.6  |     |      | 59.7  | 0.5  |     |      | 68.5  | 1.5  |     |      | 70.9  | 3.3  |     |      |
| <b>STIRIPENTOL</b>                                 |                          | <chem>CC(C)(C)C(O)/C=C/c1ccc2OCOc2c1</chem>                                                                                     | 4                                                         | 83.9  | 6.6  | 201 | 28.7 | 131.2 | 0.3  | 194 | 79.5 | 97.5  | 4.1  | 331 | 84.3 | 120.0 | 15.8 | 170 | 49.8 |
| 118-71-8                                           |                          | <chem>Cc1occc(=O)c1O</chem>                                                                                                     | 5                                                         | 102.1 | 6.3  |     |      | 82.2  | 1.6  |     |      | 110.7 | 1.0  |     |      | 130.0 | 29.8 |     |      |
| ROPIVACAINE HYDROCHLORIDE                          |                          | <chem>CCCN1CCCC[C@H]1C(=O)Nc2c(C)cccc2C.Cl</chem>                                                                               | 6                                                         | 94.6  | 4.3  |     |      | 48.6  | 0.2  |     |      | 100.3 | 1.0  |     |      | 113.4 | 19.4 |     |      |





|                                                                           |                                                                                                                                                                                                          |                                                                                                                           |       |      |      |     |       |       |      |     |       |       |      |     |       |      |      |     |
|---------------------------------------------------------------------------|----------------------------------------------------------------------------------------------------------------------------------------------------------------------------------------------------------|---------------------------------------------------------------------------------------------------------------------------|-------|------|------|-----|-------|-------|------|-----|-------|-------|------|-----|-------|------|------|-----|
| ENROFLOXACIN                                                              | CCN1CCN(CC1)c2cc3n(cc(C(=O)O)c(=O)c3cc2F)C4CC4                                                                                                                                                           | 5                                                                                                                         | 58.1  | 2.8  |      |     | 72.7  | 1.3   |      |     | 77.0  | 4.0   |      |     | 45.8  | 3.2  |      |     |
| KETOTIFEN FUMARATE                                                        | CN1CCC(=C2c3ccsc3C(=O)Cc4ccc24)CC1.OC(=O)/C=C/C(=O)O                                                                                                                                                     | 6                                                                                                                         | 30.3  | 3.5  | 22.3 | 3.1 | 31.3  | 0.1   | 24.3 | 2.6 | 31.9  | 5.7   | 27.0 | 1.7 | 26.3  | 2.4  | 12.7 | 1.3 |
| RIMCAZOLE                                                                 | C[C@H]1CN(CCCn2c3cccc3c4cccc24)C[C@@H](C)N1.O.Cl                                                                                                                                                         | 7                                                                                                                         | 29.5  | 3.7  |      |     | 25.5  | 1.0   |      |     | 31.7  | 8.4   |      |     | 23.2  | 0.8  |      |     |
| BENZO[A]PHENANTHRIDINE-10,11-DIOL, 5,6,6A,7,8,12B-HEXAHYDRO-, TRANS-[CAS] | Oc1cc2CC[C@H]3NCc4cccc4[C@@H]3c2cc1O.O.Cl                                                                                                                                                                | 8                                                                                                                         | 15.8  | 7.2  |      |     | 5.3   | 1.1   |      |     | 10.9  | 3.1   |      |     | 4.6   | 1.0  |      |     |
| DACTINOMYCIN                                                              | CC(C)[C@H]1NC(=O)[C@@H](NC(=O)c2ccc(C)c3oc4c(C)c(=O)c(N)c(C(=O)N[C@H]5[C@@H](C)OC(=O)[C@H](C(C)C)N(C)C(=O)CN(C)C(=O)[C@@H]6CCCN6C(=O)[C@H](NC5=O)C(C)C)c4nc23)[C@@H](C)OC(=O)[C@H](C(C)C)N(C)C(=O)CN(C)C | 9                                                                                                                         | 85.6  | 2.7  |      |     | 97.9  | 0.2   |      |     | 30.7  | 26.5  |      |     | 84.3  | 6.8  |      |     |
| ITAVASTATIN CA                                                            | O[C@H](C[C@H](O)/C=C/c1c(nc2cccc2c1c3ccc(F)cc3)C4CC4)C(=O)O[Ca]OC(=O)C[C@H](O)C[C@H](O)/C=C/c5c(nc6cccc6c5c7ccc(F)cc7)C8CC8                                                                              | 10                                                                                                                        | 94.0  | 1.5  |      |     | 88.5  | 1.9   |      |     | 105.3 | 4.3   |      |     | 64.3  | 1.9  |      |     |
|                                                                           | O=C(CCN(C(=O)C1cnc1)N)CC2CCCC2                                                                                                                                                                           | 11                                                                                                                        | 104.8 | 4.8  |      |     | 108.6 | 2.0   |      |     | 115.2 | 0.0   |      |     | 106.0 | 9.1  |      |     |
| PLATE 4                                                                   |                                                                                                                                                                                                          |                                                                                                                           |       |      |      |     |       |       |      |     |       |       |      |     |       |      |      |     |
| A                                                                         |                                                                                                                                                                                                          |                                                                                                                           |       |      |      |     |       |       |      |     |       |       |      |     |       |      |      |     |
|                                                                           |                                                                                                                                                                                                          | Nc1nc(Cl)nc2n(cnc12)[C@@H]3O[C@H](CO)[C@@H](O)[C@H]3O                                                                     | 2     | 95.2 | 0.3  |     |       | 100.6 | 2.1  |     |       | 112.6 | 0.1  |     | 97.1  | 3.6  |      |     |
|                                                                           | ALTANSERIN                                                                                                                                                                                               | Fc1ccc(cc1)C(=O)C2CCN(CCN3C(=O)c4cccc4[nH]c3=S)CC2.O.Cl                                                                   | 3     | 36.8 | 7.2  |     |       | 40.9  | 6.9  |     |       | 59.5  | 3.2  |     | 42.5  | 5.2  |      |     |
|                                                                           |                                                                                                                                                                                                          | CCO/C(=C\C1/C(C(=O)N=C1)C(=O)OC)c2cccc(c2)[N+](=O)[O-]/O                                                                  | 4     | 52.6 | 21.6 |     |       | 45.9  | 23.5 |     |       | 63.8  | 27.3 |     | 42.5  | 23.9 |      |     |
|                                                                           | RUTIN                                                                                                                                                                                                    | C[C@@H]1O[C@@H](OC[C@H]2O[C@@H](Oc3c(oc4cc(O)cc(O)c4c3=O)c5ccc(O)c(O)c5)[C@H](O)[C@@H](O)[C@@H]2O)[C@H](O)[C@H](O)[C@H]1O | 5     | 87.0 | 3.9  |     |       | 79.7  | 2.7  |     |       | 102.2 | 2.4  |     | 94.6  | 0.3  |      |     |

**B**

|                                                                  |                                                                                                                                                                           |    |       |      |     |      |       |     |     |      |       |      |     |     |       |      |     |      |
|------------------------------------------------------------------|---------------------------------------------------------------------------------------------------------------------------------------------------------------------------|----|-------|------|-----|------|-------|-----|-----|------|-------|------|-----|-----|-------|------|-----|------|
| RITONAVIR                                                        | <chem>CC(C)[C@H](NC(=O)N(C)Cc1csc(n1)C(C)C(=O)N[C@H](C[C@H](O)[C@H](Cc2cccc2)NC(=O)OCc3cncs3)Cc4cccc4</chem>                                                              | 6  | 10.9  | 0.6  |     |      | 19.5  | 2.5 |     |      | 7.2   | 8.5  |     |     | 12.1  | 16.0 |     |      |
|                                                                  | <chem>COc1cc(OC)cc(/C=C/c2ccc(O)cc2)c1</chem>                                                                                                                             | 7  | 124.0 | 11.7 |     |      | 93.2  | 3.1 |     |      | 102.9 | 0.3  |     |     | 127.2 | 7.3  |     |      |
| <b>TICLOPIDINE HYDROCHLORIDE</b>                                 | <chem>Clc1cccc1CN2CCc3sccc3C2.Cl</chem>                                                                                                                                   | 8  | 84.6  | 2.9  | 678 | 98.3 | 96.3  | 4.4 | 444 | 67.3 | 79.2  | 13.6 | 692 | 110 | 72.0  | 25.7 | 442 | 56.1 |
| PHYSOSTIGMINE                                                    | <chem>CNC(=O)Oc1ccc2N(C)C3N(C)CC[C@@]3(C)c2c1.OS(=O)(=O)O</chem>                                                                                                          | 9  | 64.5  | 6.8  |     |      | 69.6  | 3.5 |     |      | 59.2  | 4.4  |     |     | 80.1  | 3.4  |     |      |
| RIZATRIPTAN BENZOATE                                             | <chem>CN(C)CCc1c[nH]c2ccc(Cn3cncn3)cc12.OC(=O)c1cccc1</chem>                                                                                                              | 10 | 24.2  | 2.3  |     |      | 32.9  | 3.0 |     |      | 39.1  | 0.1  |     |     | 30.0  | 0.4  |     |      |
| ITOPRIDE HCL                                                     | <chem>COc1ccc(cc1OC)C(=O)NCc2ccc(OCCN(C)C)cc2.Cl</chem>                                                                                                                   | 11 | 24.6  | 1.2  |     |      | 30.8  | 3.9 |     |      | 36.0  | 1.7  |     |     | 17.3  | 3.9  |     |      |
|                                                                  | <chem>Cc1ncc([N+](=O)[O-])n1CC(O)CCl</chem>                                                                                                                               | 2  | 90.3  | 1.0  |     |      | 97.3  | 4.4 |     |      | 102.9 | 1.1  |     |     | 99.5  | 1.3  |     |      |
| ACETAMIDE, 2-AMINO-N-(1-METHYL-1,2-DIPHENYLETHYL)-, (+/-)- [CAS] | <chem>CC(Cc1cccc1)(NC(=O)CN)c2ccc(cc2.Cl</chem>                                                                                                                           | 3  | 83.9  | 2.1  |     |      | 78.6  | 4.0 |     |      | 92.8  | 1.1  |     |     | 83.7  | 1.0  |     |      |
| SAQUINAVIR MESYLATE                                              | <chem>CC(C)(C)NC(=O)[C@@H]1C[C@@H]2CCCC[C@@H]2CN1C[C@@H](O)[C@H](Cc3cccc3)NC(=O)[C@H](CC(=O)N)NC(=O)c4cccc5cccc5n4.CS(=O)(=O)O</chem>                                     | 4  | 9.3   | 3.1  |     |      | 11.5  | 7.6 |     |      | 14.2  | 2.6  |     |     | 12.0  | 2.8  |     |      |
| PENCICLOVIR                                                      | <chem>Nc1nc(O)c2ncn(CCC(CO)CO)c2n1</chem>                                                                                                                                 | 5  | 94.5  | 0.9  |     |      | 96.4  | 4.3 |     |      | 102.3 | 0.7  |     |     | 95.6  | 1.3  |     |      |
| VINORELBINEÂ TARTRATE                                            | <chem>CCC1=C[C@H]2CN(C1)Cc3c([nH]c4cccc34)[C@@](C2)(C(=O)OC)c5cc6c(cc5OC)N(C)[C@@H]7[C@@]86CCN9CC=C[C@](C)([C@H]98)[C@H](OC(=O)C)[C@]7(O)C(=O)OC(C(O)C(=O)O)C(=O)O</chem> | 6  | 65.0  | 3.3  |     |      | 72.1  | 2.9 |     |      | 93.4  | 0.3  |     |     | 70.9  | 3.6  |     |      |
| ROXATIDINE ACETATEÂ HYDROCHLORIDE                                | <chem>CC(=O)OCC(=O)NCCCCc1cccc(CN2CCCC2)c1.Cl</chem>                                                                                                                      | 7  | 24.0  | 2.2  |     |      | 29.5  | 6.0 |     |      | 41.4  | 1.8  |     |     | 27.0  | 1.4  |     |      |
| SODIUMÂ LOXOPROFEN                                               | <chem>CC(C(=O)[O-])c1ccc(CC2CCCC2=O)cc1.[Na+]</chem>                                                                                                                      | 8  | 99.3  | 2.4  |     |      | 102.1 | 6.0 |     |      | 103.8 | 3.4  |     |     | 94.0  | 2.1  |     |      |

|                                                                                                                                 |                                                                                                                                                                            |                                                                                                      |      |      |     |  |  |      |      |     |  |  |      |      |      |  |  |      |      |      |
|---------------------------------------------------------------------------------------------------------------------------------|----------------------------------------------------------------------------------------------------------------------------------------------------------------------------|------------------------------------------------------------------------------------------------------|------|------|-----|--|--|------|------|-----|--|--|------|------|------|--|--|------|------|------|
| 1H-INDOLE-2-PROPANOIC ACID, 1-[(4-CHLOROPHENYL)METHYL]-3-[(1,1-DIMETHYLETHYL)THIO]-ALPHA,ALPHA-DIMETHYL-5-(1-METHYLETHYL)-[CAS] | <chem>CC(C)c1ccc2n(Cc3ccc(Cl)cc3)c(C(C)(C)C(=O)O)c(SC(C)(C)C)c2c1</chem>                                                                                                   | 9                                                                                                    | 75.8 | 6.3  |     |  |  | 70.3 | 10.4 |     |  |  | 90.7 | 3.6  |      |  |  | 77.5 | 1.9  |      |
| RIFAPENTINE                                                                                                                     | <chem>CO[C@H]1C=CO[C@@]2(C)Oc3c(C2=O)c4c(O)c(C=NN5CCN(CC5)C6CCCC6)c(NC(=O)C(=CC=C[C@@H](C)[C@H](O)[C@@H](C)[C@@H](O)[C@@H](C)[C@H](OC(=O)C)[C@@H]1C)C)c(O)c4c(O)c3C</chem> | 10                                                                                                   | 64.7 | 2.1  |     |  |  | 73.4 | 2.0  |     |  |  | 80.6 | 2.6  |      |  |  | 69.9 | 3.3  |      |
| RIFAXIMIN                                                                                                                       | <chem>CO[C@H]1C=CO[C@@]2(C)Oc3c(C2=O)c4c5nc6cc(C)ccn6c5c(NC(=O)C(=CC=C[C@H](C)[C@H](O)[C@@H](C)[C@@H](O)[C@@H](C)[C@H](OC(=O)C)[C@@H]1C)C)c(O)c4c(O)c3C</chem>             | 11                                                                                                   | 82.2 | 2.5  |     |  |  | 78.3 | 3.1  |     |  |  | 82.8 | 5.4  |      |  |  | 84.3 | 6.2  |      |
| C                                                                                                                               | 1,1-DIMETHYL-4-PHENYLPYPERAZINIUM IODIDE                                                                                                                                   | <chem>C[N+](C)CCN(CC1)C2CCCC2.[I-]</chem>                                                            | 2    | 81.8 | 1.7 |  |  |      | 84.5 | 0.3 |  |  |      | 94.1 | 3.0  |  |  |      | 81.6 | 2.2  |
|                                                                                                                                 |                                                                                                                                                                            | <chem>CC(C)NCC(O)COc1ccc(CCOCC2C2)cc1.Cl</chem>                                                      | 3    | 32.7 | 3.7 |  |  |      | 38.7 | 1.5 |  |  |      | 34.8 | 3.3  |  |  |      | 37.2 | 2.1  |
|                                                                                                                                 | 60628-96-8                                                                                                                                                                 | <chem>c1cn(cn1)C(c2ccccc2)c3ccc(cc3)c4ccccc4</chem>                                                  | 4    | 85.9 | 8.3 |  |  |      | 85.3 | 9.5 |  |  |      | 85.6 | 19.1 |  |  |      | 85.6 | 11.2 |
|                                                                                                                                 | CALCITRIOL                                                                                                                                                                 | <chem>C[C@H](CCCC(C)O)[C@H]1CC[C@H]2/C=C/C=C\3/C[C@@H](O)[C@H](O)C3=C)/CCC[C@]12C</chem>             | 5    | 44.6 | 2.2 |  |  |      | 45.6 | 7.0 |  |  |      | 63.9 | 0.0  |  |  |      | 44.9 | 3.4  |
|                                                                                                                                 | LINEZOLID                                                                                                                                                                  | <chem>CC(=O)NC[C@H]1CN(C(=O)O)C2ccc(N3CCOCC3)c(F)c2</chem>                                           | 6    | 86.4 | 0.9 |  |  |      | 86.4 | 0.2 |  |  |      | 95.0 | 1.9  |  |  |      | 84.9 | 2.7  |
|                                                                                                                                 | DEXBROMPHENIRAMINE MALEATE                                                                                                                                                 | <chem>CN(C)CC[C@@H](c1ccc(Br)cc1)c2cccn2.OC(=O)/C=C/C(=O)O</chem>                                    | 7    | 64.7 | 1.1 |  |  |      | 65.2 | 1.6 |  |  |      | 62.0 | 6.0  |  |  |      | 56.8 | 0.8  |
|                                                                                                                                 | ZAFIRLUKAST                                                                                                                                                                | <chem>COc1cc(ccc1Cc2cn(C)C3ccc(NC(=O)OC4CCCC4)cc23)C(=O)NS(=O)(=O)c5ccccc5C</chem>                   | 8    | 23.1 | 2.4 |  |  |      | 20.3 | 6.4 |  |  |      | 49.3 | 0.2  |  |  |      | 18.8 | 6.7  |
|                                                                                                                                 | 562-10-7                                                                                                                                                                   | <chem>CN(C)CCOC(C)(c1ccccc1)c2cccn2.OC(=O)CCC(=O)O</chem>                                            | 9    | 40.1 | 3.2 |  |  |      | 44.5 | 3.2 |  |  |      | 53.0 | 1.2  |  |  |      | 43.2 | 1.4  |
|                                                                                                                                 | LOTEPREDNOL ETABONATE                                                                                                                                                      | <chem>CCOC(=O)O[C@@]1(CC[C@H]2[C@@H]3CCC4=CC(=O)C=C[C@]4(C)[C@H]3[C@@H](O)C[C@@]21C)C(=O)OCCl</chem> | 10   | 75.9 | 3.3 |  |  |      | 73.7 | 0.9 |  |  |      | 86.5 | 0.9  |  |  |      | 74.5 | 3.9  |

|   |                                      |                                                                                                                  |    |       |      |      |     |       |      |      |     |       |     |  |  |       |      |      |      |
|---|--------------------------------------|------------------------------------------------------------------------------------------------------------------|----|-------|------|------|-----|-------|------|------|-----|-------|-----|--|--|-------|------|------|------|
| D | MONTELUKAST SODIUM                   | <chem>CC(C)(O)c1ccccc1CC[C@@H](S<br/>CC2(CC(=O)[O-<br/>])CC2)c3cccc(/C=C/c4ccc5ccc(Cl<br/>)cc5n4)c3.[Na+]</chem> | 11 | 59.9  | 7.6  |      |     | 62.3  | 4.6  |      |     | 79.6  | 1.7 |  |  | 67.2  | 7.9  |      |      |
|   |                                      | <chem>Cc1nc2cccn2c(=O)c1CCN3CCC(</chem>                                                                          | 2  | 4.2   | 0.8  |      |     | 16.3  | 4.4  |      |     | 18.1  | 2.7 |  |  | 15.5  | 2.4  |      |      |
|   |                                      | <chem>Oc1[nH]c2ccccc2c1C3=Nc4cccc</chem>                                                                         | 3  | 92.4  | 0.7  |      |     | 91.8  | 3.1  |      |     | 103.2 | 0.6 |  |  | 90.6  | 0.0  |      |      |
|   | SUMATRIPTAN<br>SUCCINATE             | <chem>CNS(=O)(=O)Cc1ccc2[nH]cc(CC</chem>                                                                         | 4  | 41.7  | 1.8  |      |     | 48.1  | 1.4  |      |     | 57.9  | 4.7 |  |  | 38.2  | 0.8  |      |      |
|   | DIPHENOXYLATE                        | <chem>CCOC(=O)C1(CCN(CCC(C#N)(c2</chem>                                                                          | 5  | 99.9  | 0.4  |      |     | 111.9 | 20.5 |      |     | 107.0 | 1.0 |  |  | 95.2  | 4.9  |      |      |
|   | LOMERIZINE DIHCL                     | <chem>COc1ccc(CN2CCN(CC2)C(c3ccc(</chem>                                                                         | 6  | 87.1  | 7.5  |      |     | 81.8  | 8.6  |      |     | 96.5  | 4.9 |  |  | 103.7 | 0.4  |      |      |
|   | ANAGRELIDE<br>HYDROCHLORIDE          | <chem>Clc1ccc2N=C3NC(=O)CN3Cc2c1</chem>                                                                          | 7  | 67.1  | 8.9  |      |     | 71.4  | 4.1  |      |     | 76.9  | 1.4 |  |  | 70.1  | 11.6 |      |      |
|   | <b>TERBINAFINE<br/>HYDROCHLORIDE</b> | <chem>CN(C/C=C/C#CC(C)(C)Cc1cccc</chem>                                                                          | 8  | 93.3  | 0.2  | #### | ### | 93.3  | 3.7  |      |     | 104.3 | 0.4 |  |  | 95.2  | 0.4  |      |      |
|   | MILNACIPRAN                          | <chem>CCN(CC)C(=O)[C@@]1(C[C@@</chem>                                                                            | 9  | 69.4  | 0.6  |      |     | 72.9  | 0.4  |      |     | 78.3  | 1.3 |  |  | 66.7  | 3.4  |      |      |
|   | ENALAPRILAT                          | <chem>C[C@H](N[C@@H](CCc1cccc1</chem>                                                                            | 10 | 100.5 | 3.6  |      |     | 93.1  | 1.0  |      |     | 104.8 | 0.3 |  |  | 96.8  | 2.5  |      |      |
|   | 2',3'-DIDEOXYCYTIDINE                | <chem>Nc1ccn([C@H]2CC[C@@H](CO</chem>                                                                            | 11 | 101.8 | 10.1 |      |     | 88.4  | 0.4  |      |     | 103.0 | 1.2 |  |  | 92.8  | 2.7  |      |      |
| E | 72-33-3                              | <chem>COc1ccc2[C@H]3CC[C@@]4(C</chem>                                                                            | 2  | 95.4  | 1.5  |      |     | 94.8  | 3.6  |      |     | 105.6 | 1.4 |  |  | 96.8  | 1.0  |      |      |
|   | AZASETRON                            | <chem>CN1C(=O)COc2c(cc(Cl)cc12)C(=</chem>                                                                        | 3  | 3.8   | 1.4  |      |     | 14.1  | 2.5  |      |     | 6.0   | 0.1 |  |  | 8.8   | 0.4  |      |      |
|   | EXEMESTANE                           | <chem>C[C@@]12CC[C@H]3[C@@H](</chem>                                                                             | 4  | 8.8   | 0.6  |      |     | 19.3  | 3.6  |      |     | 13.4  | 0.6 |  |  | -1.7  | 2.1  |      |      |
|   | FELBAMATE                            | <chem>NC(=O)OCC(COC(=O)N)c1cccc</chem>                                                                           | 5  | 92.4  | 4.6  |      |     | 92.4  | 1.1  |      |     | 103.2 | 1.4 |  |  | 89.7  | 0.2  |      |      |
|   | EFAVIRENZ                            | <chem>FC(F)(F)[C@]1(OC(=O)Nc2ccc(Cl</chem>                                                                       | 6  | 87.1  | 6.8  |      |     | 82.1  | 12.0 |      |     | 100.7 | 1.2 |  |  | 86.0  | 12.0 |      |      |
|   | TEGASEROD MALEATE                    | <chem>CCCCN=C(N)NN=Cc1c[nH]c2cc</chem>                                                                           | 7  | -0.7  | 10.8 |      |     | 9.7   | 2.1  |      |     | 0.5   | 2.4 |  |  | 21.7  | 8.5  |      |      |
|   | ISRADIPINE                           | <chem>CO/C(=C)\1/C(C(=C(C)N=C1C)C(</chem>                                                                        | 8  | 43.8  | 16.5 |      |     | 45.9  | 10.1 |      |     | 61.0  | 9.5 |  |  | 37.0  | 8.1  |      |      |
|   | <b>5-FLUORO-2-<br/>PYRIMIDONE</b>    | <chem>Oc1nc(F)cn1</chem>                                                                                         | 9  | 103.3 | 3.1  | 1444 | 315 | 100.7 | 8.1  | 1587 | 384 | 103.9 | 1.4 |  |  | 95.3  | 2.5  | 5138 | 2114 |

|   |                                                                                                                   |                                                                                                                 |      |      |      |      |      |       |      |      |      |       |     |      |      |      |     |      |     |
|---|-------------------------------------------------------------------------------------------------------------------|-----------------------------------------------------------------------------------------------------------------|------|------|------|------|------|-------|------|------|------|-------|-----|------|------|------|-----|------|-----|
| F | <b>DONEPEZIL</b>                                                                                                  | <chem>COc1cc2CC(CC3CCN(Cc4ccccc4)CC3)C(=O)c2cc1OC.Cl</chem>                                                     | 10   | 4.3  | 1.0  | 1.2  | 0.2  | 10.3  | 2.3  | 1.5  | 0.2  | 3.5   | 1.0 | 1.3  | 0.1  | 7.6  | 0.2 | 0.78 | 0.1 |
|   | 1H-IMIDAZOL-2-AMINE, N-(2,6-DICHLOROPHENYL)-4,5-DIHYDRO- [CAS]                                                    | <chem>Clc1cccc(Cl)c1NC2=NCCN2.Cl</chem>                                                                         | 11   | 37.1 | 7.9  |      |      | 35.0  | 9.2  |      |      | 38.1  | 2.1 |      |      | 33.6 | 2.8 |      |     |
|   | BENACTYZINE HYDROCHLORIDE                                                                                         | <chem>CCN(CC)CCOC(=O)C(O)(c1ccccc1)c2ccccc2.Cl</chem>                                                           | 2    | 29.9 | 5.9  |      |      | 34.2  | 8.0  |      |      | 58.9  | 2.5 |      |      | 38.5 | 3.6 |      |     |
|   | GR 89696                                                                                                          | <chem>COC(=O)N1CCN(C(CN2CCCC2)C1)C(=O)Cc3ccc(Cl)c(Cl)c3.OC(=O)/C=C/C(=O)O</chem>                                | 3    | 51.5 | 4.0  |      |      | 57.7  | 4.2  |      |      | 71.2  | 0.1 |      |      | 51.9 | 2.9 |      |     |
|   | NITAZOXANIDE                                                                                                      | <chem>CC(=O)Oc1ccccc1C(=O)Nc2ncc(s2)[N+](=O)[O-]</chem>                                                         | 4    | 66.3 | 0.6  |      |      | 104.9 | 20.9 |      |      | 78.4  | 1.1 |      |      | 55.1 | 9.0 |      |     |
|   |                                                                                                                   | <chem>Oc1nc2ccccc2n1C3=CCN(CCCC(=O)c4ccc(F)cc4)CC3</chem>                                                       | 5    | 10.3 | 2.8  |      |      | 18.2  | 3.9  |      |      | 16.8  | 6.2 |      |      | 12.5 | 3.0 |      |     |
|   | IRBESARTAN                                                                                                        | <chem>CCCCC1=NC2(CCCC2)C(=O)N1C3ccc(cc3)c4ccccc4c5nn[nH]n5</chem>                                               | 6    | 87.6 | 1.1  |      |      | 84.4  | 4.4  |      |      | 92.7  | 0.0 |      |      | 90.3 | 1.2 |      |     |
|   | MILRINONE                                                                                                         | <chem>Cc1nc(O)c(C#N)cc1c2ccncc2</chem>                                                                          | 7    | 74.5 | 0.2  |      |      | 79.9  | 6.5  |      |      | 74.3  | 0.1 |      |      | 71.3 | 4.1 |      |     |
|   | VALSARTAN                                                                                                         | <chem>CCCC(=O)N(Cc1ccc(cc1)c2cccc2c3nn[nH]n3)[C@@H](C(C)C)C(=O)O</chem>                                         | 8    | 94.9 | 3.0  |      |      | 87.8  | 0.7  |      |      | 106.4 | 2.7 |      |      | 96.6 | 2.4 |      |     |
|   | CHLORPHENIRAMINE                                                                                                  | <chem>CN(C)CCC(c1ccc(Cl)cc1)c2cccn2.OC(=O)/C=C\C(=O)O</chem>                                                    | 9    | 52.3 | 13.3 |      |      | 67.1  | 12.4 |      |      | 69.1  | 3.5 |      |      | 59.3 | 1.7 |      |     |
|   | <chem>CN1C(=O)CN=C(c2ccccc2)c3cc(cc13)[N+](=O)[O-]</chem>                                                         | 10                                                                                                              | 65.0 | 5.8  |      |      | 64.6 | 1.8   |      |      | 72.1 | 2.4   |     |      | 68.6 | 3.8  |     |      |     |
| G | 6H-PYRIDO[2,3-B][1,4]BENZODIAZEPIN-6-ONE, 11-[[2-[(DIETHYLAMINO)METHYL]-1-PIPERIDINYL]ACETYL]-5,11-DIHYDRO- [CAS] | <chem>CCN(CC)CC1CCCN1CC(=O)N2c3ccccc3C(=O)Nc4ccncc4</chem>                                                      | 11   | 58.7 | 0.0  |      |      | 68.5  | 3.7  |      |      | 81.2  | 3.4 |      |      | 49.1 | 7.0 |      |     |
|   |                                                                                                                   | <chem>NCCc1cccn1</chem>                                                                                         | 2    | 82.1 | 2.8  |      |      | 89.0  | 6.4  |      |      | 89.1  | 2.2 |      |      | 80.8 | 1.4 |      |     |
|   | <b>DELTA1-HYDROCORTISONE 21-HEMISUCCINATE SODIUM SALT</b>                                                         | <chem>C[C@@]12C[C@H](O)[C@H]3[C@@H](CCC4=CC(=O)C=C[C@]34C)[C@@H]2CC[C@]1(O)C(=O)COC(=O)CCC(=O)[O-].[Na+]</chem> | 3    | 69.7 | 4.5  | 66.7 | 7.4  | 75.9  | 3.5  | 57.3 | 11.7 | 87.2  | 3.3 | #### | 18.2 | 69.3 | 2.9 | 64.1 | 9.2 |
|   |                                                                                                                   | <chem>CN1C(=O)CN=C(c2ccccc2)c3cc(Cl)ccc13</chem>                                                                | 4    | 46.3 | 4.3  |      |      | 50.1  | 2.2  |      |      | 59.0  | 2.2 |      |      | 41.3 | 1.1 |      |     |
|   |                                                                                                                   | <chem>CC(=O)CCCCn1c(=O)n(C)c2ncn(C)c2c1=O</chem>                                                                | 5    | 76.7 | 1.6  |      |      | 85.2  | 7.7  |      |      | 80.4  | 5.8 |      |      | 66.2 | 1.3 |      |     |
|   |                                                                                                                   | <chem>CCOc1cc(CC(=O)N[C@@H](CC(C)C)c2ccccc2N3CCCC3)ccc1C(=O)O</chem>                                            | 6    | 85.4 | 4.5  |      |      | 94.3  | 13.1 |      |      | 98.3  | 0.5 |      |      | 86.5 | 5.2 |      |     |
|   | LEVOCETIRIZINE                                                                                                    | <chem>OC(=O)COCCN1CCN(CC1)[C@H](c2ccccc2)c3ccc(Cl)cc3</chem>                                                    | 7    | 81.6 | 2.6  |      |      | 85.3  | 0.5  |      |      | 83.2  | 0.8 |      |      | 75.5 | 7.1 |      |     |

|          |                                                                             |                                                                         |    |       |      |  |  |       |      |  |  |       |     |  |  |       |      |  |  |
|----------|-----------------------------------------------------------------------------|-------------------------------------------------------------------------|----|-------|------|--|--|-------|------|--|--|-------|-----|--|--|-------|------|--|--|
|          | PIROXICAM                                                                   | CN1C(=C(O)c2ccccc2S1(=O)=O)C(=O)Nc3ccccc3.O                             | 8  | 98.5  | 6.6  |  |  | 71.0  | 22.1 |  |  | 102.4 | 0.4 |  |  | 87.8  | 12.3 |  |  |
|          | DOFETILIDE                                                                  | CN(CCOC1ccc(NS(=O)(=O)C)cc1)CCc2ccc(NS(=O)(=O)C)cc2                     | 9  | 12.9  | 0.6  |  |  | 28.3  | 6.5  |  |  | 20.3  | 0.8 |  |  | 13.4  | 3.7  |  |  |
|          |                                                                             | [O-][N+](=O)OCCNC(=O)c1cccnc1                                           | 10 | 79.0  | 7.1  |  |  | 85.5  | 2.0  |  |  | 93.4  | 4.5 |  |  | 66.7  | 11.2 |  |  |
|          | 3'-DEOXYDENOSINE                                                            | Nc1ncnc2n(cnc12)[C@@H]3O[C@H](CO)C[C@@H]3O.O                            | 11 | 79.6  | 2.3  |  |  | 83.6  | 2.0  |  |  | 92.7  | 0.2 |  |  | 73.8  | 0.2  |  |  |
| <b>H</b> | 79-43-6                                                                     | OC(=O)C(Cl)Cl                                                           | 2  | 105.2 | 4.8  |  |  | 99.3  | 4.7  |  |  | 112.8 | 0.4 |  |  | 101.2 | 0.3  |  |  |
|          |                                                                             | CC1=NS(=O)(=O)c2cc(Cl)ccc2N1                                            | 3  | 80.3  | 11.0 |  |  | 74.0  | 12.1 |  |  | 96.6  | 4.7 |  |  | 80.7  | 14.9 |  |  |
|          | QUETIAPINE<br>HEMIFUMARATE                                                  | OCCOCCN1CCN(CC1)C2=Nc3ccc<br>cc3Sc4ccccc24.OC(=O)/C=C/C(=O)O            | 4  | 16.7  | 3.6  |  |  | 23.5  | 12.0 |  |  | 30.6  | 2.7 |  |  | 19.8  | 17.3 |  |  |
|          | 1H-IMIDAZOLE-5-CARBOXYLIC ACID, 1-(1-PHENYLETHYL)-, ETHYL ESTER, (R)- [CAS] | CCOC(=O)c1cncn1[C@H](C)c2ccccc2                                         | 5  | 70.2  | 8.0  |  |  | 88.2  | 25.2 |  |  | 79.9  | 0.5 |  |  | 76.4  | 11.8 |  |  |
|          |                                                                             | CC[C@]1(O)CC[C@H]2[C@@H]3CCC4=CCCC[C@H]4[C@H]3CC[C@@]21C                | 6  | 82.4  | 5.8  |  |  | 72.4  | 0.7  |  |  | 87.5  | 5.0 |  |  | 80.2  | 6.7  |  |  |
|          | CITALOPRAM                                                                  | CN(C)CCCC1(OCC2cc(C#N)ccc21)c3ccc(F)cc3.Br                              | 7  | 53.1  | 4.1  |  |  | 56.5  | 2.3  |  |  | 67.7  | 0.1 |  |  | 54.9  | 0.8  |  |  |
|          |                                                                             | C[N+](C)CCC(C1OC(=O)C(O)(C2CCCC2)c3ccccc3.[Br-])                        | 8  | 65.5  | 1.5  |  |  | 66.4  | 6.4  |  |  | 82.7  | 4.8 |  |  | 63.0  | 6.2  |  |  |
|          | FORMOTEROL<br>FUMARATE DIHYDRATE                                            | COc1ccc(C[C@H](C)NC[C@@H](O)c2ccc(O)c(NC(=O)c2)cc1.O.O C(=O)/C=C/C(=O)O | 9  | 27.5  | 0.9  |  |  | 52.4  | 14.3 |  |  | 48.4  | 1.8 |  |  | 25.7  | 2.7  |  |  |
|          |                                                                             | CCCc1nc2c(C)cc(cc2n1Cc3ccc(c3)c4ccccc4C(=O)O)c5nc6ccccc6n5C             | 10 | 14.8  | 0.6  |  |  | 26.2  | 4.6  |  |  | 25.1  | 2.5 |  |  | 11.9  | 1.6  |  |  |
|          | IFENPRODIL                                                                  | CC(C(O)c1ccc(O)cc1)N2CCC(Cc3ccccc3)CC2.O.OC(C(O)C(=O)O)C(=O)O           | 11 | 35.2  | 2.0  |  |  | 45.3  | 1.8  |  |  | 42.7  | 1.8 |  |  | 43.2  | 4.2  |  |  |
|          |                                                                             | <b>PLATE 5</b>                                                          |    |       |      |  |  |       |      |  |  |       |     |  |  |       |      |  |  |
| <b>A</b> | 5-AMINO-2-HYDROXY-BENZOIC ACID                                              | Nc1ccc(O)c(c1)C(=O)O                                                    | 2  | 110.0 | 9.1  |  |  | 118.3 | 6.1  |  |  | 95.0  | 9.6 |  |  | 107.1 | 9.3  |  |  |
|          | ZACOPRIDE                                                                   | COc1cc(N)c(Cl)cc1C(=O)NC2CN3CCC2CC3.O.Cl                                | 3  | 3.2   | 2.2  |  |  | 15.8  | 15.7 |  |  | 2.0   | 0.3 |  |  | 1.6   | 0.0  |  |  |
|          | LOXAPINE                                                                    | CN1CCN(CC1)C2=Nc3ccccc3Oc4ccc(Cl)cc24.OC(=O)CCC(=O)O                    | 4  | 62.0  | 1.1  |  |  | 101.5 | 25.3 |  |  | 72.1  | 9.5 |  |  | 52.9  | 2.0  |  |  |

|                                                                       |                                                                                                                                                                                |    |       |      |  |  |       |      |  |  |       |      |  |  |       |      |
|-----------------------------------------------------------------------|--------------------------------------------------------------------------------------------------------------------------------------------------------------------------------|----|-------|------|--|--|-------|------|--|--|-------|------|--|--|-------|------|
| PANCURONIUM                                                           | <chem>CC(=O)OC1C(C[C@H]2C3CC[C@H]4C[C@H](OC(=O)C)C(C4(C)[C@H]3CCC12C)[N+]5(C)CCCC5)[N+]6(C)CCCC6.[Br-]</chem>                                                                  | 5  | 88.1  | 5.2  |  |  | 111.4 | 5.0  |  |  | 90.9  | 7.3  |  |  | 101.7 | 16.3 |
| PICROTIIN -<br>PICROTOXININ                                           | <chem>CC(C)(O)[C@@H]1[C@H]2OC(=O)[C@@H]1[C@]3(O)C[C@H]4O[C@]45C(=O)O[C@H]2[C@@]53C.[C@]12([C@@]3(O1)[H])[C@](C)([C@H](OC2=O)[C@H](OC4=O)[C@H]([C@H]45)C(C)=C)[C@]5(C3)O</chem> | 6  | 68.8  | 27.6 |  |  | 120.4 | 14.0 |  |  | 127.1 | 11.4 |  |  | 11.9  | 55.0 |
| CLOTRIMAZOLE                                                          | <chem>Clc1cccc1C(c2cccc2)(c3cccc3)n4ccnc4</chem>                                                                                                                               | 7  | 85.6  | 15.6 |  |  | 122.3 | 19.2 |  |  | 98.3  | 7.0  |  |  | 90.5  | 7.0  |
| CINANSERIN                                                            | <chem>CN(C)CCCSc1cccc1NC(=O)/C=C/c2cccc2.O.Cl</chem>                                                                                                                           | 8  | 20.2  | 1.2  |  |  | 17.6  | 38.5 |  |  | 20.2  | 0.6  |  |  | 13.1  | 15.0 |
| FLUVOXAMINE                                                           | <chem>COCCCC(=NOCCN)c1ccc(cc1)C(F)(F)F.OC(=O)/C=C\C(=O)O</chem>                                                                                                                | 9  | 73.0  | 20.7 |  |  | 97.7  | 23.5 |  |  | 71.7  | 7.5  |  |  | 67.7  | 1.0  |
| N,N'-DIACETYL-1,6-DIAMINOHEXANE                                       | <chem>CC(=O)NCCCCCNC(=O)C</chem>                                                                                                                                               | 10 | 105.1 | 3.9  |  |  | 125.3 | 7.0  |  |  | 104.3 | 9.2  |  |  | 95.1  | 4.6  |
| PYRAZINECARBOXAMIDE, 3,5-DIAMINO-N-(AMINOIMINOMETHYL)-6-CHLORO- [CAS] | <chem>NC(=N)NC(=O)c1nc(Cl)c(N)nc1N.O.Cl</chem>                                                                                                                                 | 11 | 18.0  | 1.3  |  |  | 58.7  | 33.6 |  |  | 37.1  | 11.2 |  |  | 3.5   | 3.7  |
| <b>B</b> PAROXETINE                                                   | <chem>Fc1ccc(cc1)[C@@H]2CCNC[C@H]2COc3ccc4OCOc4c3.OC(=O)/C=C\C(=O)O</chem>                                                                                                     | 2  | 69.4  | 11.2 |  |  | 71.7  | 0.7  |  |  | 47.6  | 11.7 |  |  | 64.1  | 7.7  |
| SKF 83566                                                             | <chem>CN1CCc2cc(Br)c(O)cc2C(C1)c3cccc3.Br</chem>                                                                                                                               | 3  | 38.4  | 7.0  |  |  | 44.9  | 0.2  |  |  | 40.1  | 10.9 |  |  | 26.2  | 5.0  |
| D-3-METHOXY-N-METHYLMORPHINAN HYDROBROMIDE                            | <chem>COc1ccc2C[C@H]3[C@H]4CCC[C@]4(CCN3C)c2c1.O.Br</chem>                                                                                                                     | 4  | 18.6  | 2.7  |  |  | 30.1  | 3.7  |  |  | 22.4  | 7.2  |  |  | 15.7  | 0.6  |
| 443-48-1                                                              | <chem>Cc1ncc([N+](=O)[O-])n1CCO</chem>                                                                                                                                         | 5  | 95.3  | 2.2  |  |  | 114.3 | 16.2 |  |  | 101.2 | 10.2 |  |  | 117.7 | 9.6  |
| TERAZOSIN                                                             | <chem>COc1cc2nc(nc(N)c2cc1OC)N3CCN(CC3)C(=O)C4CCCO4.O.Cl</chem>                                                                                                                | 6  | 32.7  | 2.3  |  |  | 50.9  | 13.0 |  |  | 52.5  | 2.4  |  |  | 27.9  | 32.8 |
| 79794-75-5                                                            | <chem>CCOC(=O)N1CCC(=C2c3ccc(Cl)c3CCc4ccnc24)CC1</chem>                                                                                                                        | 7  | 16.6  | 8.5  |  |  | 14.3  | 32.2 |  |  | 35.8  | 13.4 |  |  | 14.4  | 4.6  |
| CISAPRIDE                                                             | <chem>CO[C@H]1CN(CCCOC2ccc(F)cc2)CC[C@H]1NC(=O)c3cc(Cl)c(N)c3OC.O</chem>                                                                                                       | 8  | 46.3  | 6.0  |  |  | 91.3  | 23.2 |  |  | 58.6  | 14.9 |  |  | 59.6  | 15.2 |
| DOXEPIN                                                               | <chem>CN(C)CC/C=C\1/c2cccc2COc3cccc13.Cl</chem>                                                                                                                                | 9  | 52.9  | 8.9  |  |  | 79.9  | 6.2  |  |  | 53.6  | 12.4 |  |  | 24.8  | 24.0 |
| 147-24-0                                                              | <chem>CN(C)CCOC(c1cccc1)c2cccc2.Cl</chem>                                                                                                                                      | 10 | 61.2  | 3.2  |  |  | 74.4  | 2.3  |  |  | 65.6  | 22.2 |  |  | 51.1  | 9.1  |

|          |                                                                                                                                                     |                                                                             |    |      |      |  |  |      |      |  |  |      |      |  |  |       |      |
|----------|-----------------------------------------------------------------------------------------------------------------------------------------------------|-----------------------------------------------------------------------------|----|------|------|--|--|------|------|--|--|------|------|--|--|-------|------|
| <b>C</b> | 9-AMINO-1,2,3,4-TETRAHYDROACRIDINE HYDROCHLORIDE                                                                                                    | <chem>Nc1c2CCCCc2nc3cccc13.Cl</chem>                                        | 11 | 9.3  | 0.2  |  |  | 50.7 | 5.7  |  |  | 19.1 | 5.7  |  |  | 4.1   | 4.4  |
|          | LOBELINE HYDROCHLORIDE                                                                                                                              | <chem>CN1[C@H](C[C@H](O)c2cccc2)CCC[C@@H]1CC(=O)c3cccc3.Cl</chem>           | 2  | 41.0 | 5.0  |  |  | 50.8 | 4.4  |  |  | 42.4 | 8.8  |  |  | 40.0  | 1.7  |
|          | AM 404                                                                                                                                              | <chem>CCCC/C=C\C/C=C\C/C=C\C/C=C\C\CCCC(=O)Nc1ccc(O)cc1</chem>              | 3  | 76.9 | 9.0  |  |  | 70.7 | 13.0 |  |  | 75.8 | 12.1 |  |  | 61.2  | 5.5  |
|          | DULOXETINE                                                                                                                                          | <chem>CNCC[C@H](Oc1cccc2cccc12)c3cccs3</chem>                               | 4  | 69.8 | 6.4  |  |  | 80.2 | 3.4  |  |  | 72.1 | 12.0 |  |  | 81.5  | 5.0  |
|          | BENZENEACETIC ACID, ALPHA-(HYDROXYMETHYL)-, 9-METHYL-3-OXA-9-AZATRICYCLO[3.3.1.0 <sup>2,4</sup> ]NON-7-YL ESTER, [7(S)-(1ALPHA,2,4,5ALPHA,7)]-[CAS] | <chem>CN1[C@H]2CC(C[C@@H]1[C@H]3O[C@H]32)OC(=O)[C@H](CO)c4cccc4.O.Br</chem> | 5  | 58.6 | 2.8  |  |  | 77.3 | 0.2  |  |  | 82.1 | 8.5  |  |  | 84.2  | 11.4 |
|          | DIPHENYLCYCLOPROPENE                                                                                                                                | <chem>O=c1c(c1c2cccc2)c3cccc3</chem>                                        | 6  | 43.1 | 26.9 |  |  | 76.5 | 10.7 |  |  | 64.8 | 17.2 |  |  | 30.6  | 8.2  |
|          | PHENELZINE SULFATE                                                                                                                                  | <chem>NNCCc1cccc1.OS(=O)(=O)O</chem>                                        | 7  | 82.4 | 10.7 |  |  | 87.9 | 17.2 |  |  | 97.7 | 6.7  |  |  | 71.2  | 5.9  |
|          | INDATRALINE                                                                                                                                         | <chem>CN[C@@H]1C[C@H](c2cccc12)c3ccc(Cl)c(Cl)c3.Cl</chem>                   | 8  | 26.6 | 10.2 |  |  | 67.3 | 0.4  |  |  | 44.8 | 9.4  |  |  | 32.1  | 23.3 |
|          |                                                                                                                                                     | <chem>CN1CCN(CCCN2c3cccc3Sc4ccc(cc24)C(F)(F)F)CC1.Cl</chem>                 | 9  | 23.5 | 0.9  |  |  | 36.0 | 8.3  |  |  | 26.8 | 3.5  |  |  | 11.3  | 6.5  |
|          | GALANTHAMINE                                                                                                                                        | <chem>COc1ccc2CN(C)CC[C@]34C=C[C@H](O)C[C@@H]4Oc1c23.Br</chem>              | 10 | 64.0 | 1.7  |  |  | 69.6 | 0.1  |  |  | 72.7 | 19.0 |  |  | 67.8  | 12.0 |
|          | ETHYNYLESTRADIOL                                                                                                                                    | <chem>C[C@@]12CC[C@H]3[C@@H](CCc4cc(O)ccc34)[C@@H]2CC[C@@]1(O)C#C</chem>    | 11 | 80.2 | 1.7  |  |  | 80.7 | 19.7 |  |  | 74.5 | 4.8  |  |  | 75.3  | 8.7  |
| <b>D</b> | L-ORNITHINE, N5-[IMINO(METHYLAMINO)METHYL]-[CAS]                                                                                                    | <chem>CN=C(N)NCCC[C@H](N)C(=O)O.CC(=O)O</chem>                              | 2  | 90.8 | 1.9  |  |  | 94.6 | 8.3  |  |  | 88.1 | 9.2  |  |  | 102.8 | 0.0  |
|          | NALBUPHINE                                                                                                                                          | <chem>OC1CC[C@@]2(O)[C@H]3Cc4cc(O)c5OC1[C@]2(CCN3CC6CC6)c54.Cl</chem>       | 3  | 95.4 | 4.2  |  |  | 91.2 | 14.0 |  |  | 82.2 | 23.0 |  |  | 66.8  | 26.1 |
|          | GLYCINE, N-[2-[(ACETYLTHIO)METHYL]-1-OXO-3-PHENYLPROPYL]-, PHENYLMETHYL ESTER [CAS]                                                                 | <chem>CC(=O)SCC(Cc1cccc1)C(=O)NC(=O)OCc2cccc2</chem>                        | 4  | 71.6 | 17.3 |  |  | 98.7 | 42.6 |  |  | 71.7 | 3.3  |  |  | 81.9  | 16.4 |



|                                                                                                                                  |                                                                                       |                                                 |      |      |     |  |  |       |      |     |  |  |       |      |      |  |       |      |
|----------------------------------------------------------------------------------------------------------------------------------|---------------------------------------------------------------------------------------|-------------------------------------------------|------|------|-----|--|--|-------|------|-----|--|--|-------|------|------|--|-------|------|
| BENZENEACETONITRILE, ALPHA-[3-[2-(3,4-DIMETHOXYPHENYL)ETHYL]METHYLAMINO]PROPYL]-3,4-DIMETHOXY-ALPHA-(1-METHYLETHYL)-, (R)- [CAS] | <chem>COc1ccc(CCN(C)CCCC(C#N)(C(C)C)c2ccc(OC)c(OC)c2)cc1OC.O.Cl</chem>                | 5                                               | 45.0 | 11.0 |     |  |  | 57.0  | 8.6  |     |  |  | 51.2  | 19.4 |      |  | 50.9  | 7.8  |
| 4-THIAZOLIDINECARBOXYLIC ACID, 2-OXO-, (R)- [CAS]                                                                                | <chem>OC(=O)[C@@H]1CSC(=O)N1</chem>                                                   | 6                                               | 90.8 | 6.2  |     |  |  | 97.5  | 14.3 |     |  |  | 102.1 | 5.8  |      |  | 109.9 | 21.4 |
| RILUZOLE                                                                                                                         | <chem>Nc1nc2ccc(OC(F)(F)F)cc2s1.Cl</chem>                                             | 7                                               | 97.0 | 1.8  |     |  |  | 143.3 | 6.8  |     |  |  | 105.7 | 6.6  |      |  | 86.6  | 18.0 |
| 25332-39-2                                                                                                                       | <chem>Clc1cccc(c1)N2CCN(CCCn3nc4cccc4c3=O)CC2.Cl</chem>                               | 8                                               | 11.2 | 1.1  |     |  |  | 39.0  | 0.6  |     |  |  | 25.8  | 4.2  |      |  | 9.3   | 1.0  |
| (+)-3-HYDROXY-N-METHYLMORPHINAN D-TARTRATE                                                                                       | <chem>CN1CC[C@]23CCCC[C@@H]3[C@@H]1Cc4ccc(O)cc42.OC(C(O)C(=O)O)C(=O)O</chem>          | 9                                               | 9.9  | 0.3  |     |  |  | 25.1  | 8.2  |     |  |  | 14.6  | 1.1  |      |  | 8.2   | 8.5  |
| INDOMETHACIN                                                                                                                     | <chem>COc1ccc2n(C(=O)c3ccc(Cl)cc3)c(C)c(CC(=O)O)c2c1.O</chem>                         | 10                                              | 82.7 | 2.8  |     |  |  | 75.7  | 1.0  |     |  |  | 73.7  | 21.0 |      |  | 79.6  | 6.0  |
| 2(1H)-PYRIMIDINONE, 4-AMINO-1-Y-D-ARABINOFURANOSYL- [CAS]                                                                        | <chem>Nc1ccn([C@@H]2O[C@H](CO)[C@@H](O)[C@H]2O)c(=O)n1</chem>                         | 11                                              | 90.0 | 0.3  |     |  |  | 92.1  | 6.7  |     |  |  | 85.0  | 13.5 |      |  | 91.5  | 3.8  |
| E                                                                                                                                | <chem>OC(=O)C1CCn2c(ccc12)C(=O)c3cccc3.NC(CO)(CO)CO</chem>                            | 2                                               | 79.9 | 2.6  |     |  |  | 90.1  | 4.7  |     |  |  | 79.4  | 20.1 |      |  | 85.9  | 0.9  |
|                                                                                                                                  | PILOCARPINE HYDROCHLORIDE                                                             | <chem>CC[C@H]1[C@@H](Cc2cncn2C)COC1=O.Cl</chem> | 3    | 59.3 | 0.3 |  |  |       | 68.7 | 3.8 |  |  |       | 62.1 | 12.5 |  |       | 72.2 |
| BENZENEACETIC ACID, 2-[(2,6-DICHLOROPHENYL)AMINO]-, MONOSODIUM SALT [CAS]                                                        | <chem>[Na]OC(=O)Cc1cccc1Nc2c(Cl)ccc2Cl</chem>                                         | 4                                               | 96.2 | 7.3  |     |  |  | 102.6 | 23.5 |     |  |  | 83.7  | 14.7 |      |  | 75.6  | 18.9 |
|                                                                                                                                  | <chem>C[C@H](Cc1ccccc1)N(C)CC#C.Cl</chem>                                             | 5                                               | 30.0 | 2.8  |     |  |  | 38.8  | 1.3  |     |  |  | 33.9  | 6.0  |      |  | 38.2  | 13.5 |
| MESORIDAZINE                                                                                                                     | <chem>CN1CCCC1CCN2c3cccc3Sc4ccc(cc24)S(=O)C.OS(=O)(=O)c1ccc1</chem>                   | 6                                               | 14.9 | 3.2  |     |  |  | 26.0  | 5.9  |     |  |  | 21.2  | 6.0  |      |  | 14.8  | 3.6  |
| NALTRINDOLE                                                                                                                      | <chem>Oc1ccc2CC3N(CC4CC4)CC[C@]5([C@H]6Oc1c25)[C@@]3(O)Cc7c6[nH]c8ccccc78.O.Cl</chem> | 7                                               | 58.7 | 2.8  |     |  |  | 70.8  | 27.6 |     |  |  | 88.6  | 1.7  |      |  | 78.1  | 4.4  |
| PRAZOSIN                                                                                                                         | <chem>COc1cc2nc(nc(N)c2cc1OC)N3CCN(CC3)C(=O)c4ccco4.O.Cl</chem>                       | 8                                               | 11.1 | 7.4  |     |  |  | 22.6  | 17.9 |     |  |  | 26.0  | 7.6  |      |  | 19.1  | 7.2  |

**F**

|                                                                                     |                                                                    |    |      |      |  |  |       |      |  |  |       |      |  |  |       |      |  |  |
|-------------------------------------------------------------------------------------|--------------------------------------------------------------------|----|------|------|--|--|-------|------|--|--|-------|------|--|--|-------|------|--|--|
| LY 171883                                                                           | CCCc1c(O)c(ccc1OCCCCc2nn[nH]n2)C(=O)C                              | 9  | 72.1 | 4.1  |  |  | 113.8 | 9.3  |  |  | 87.7  | 1.6  |  |  | 85.5  | 11.7 |  |  |
| TETRAETHYLTHIURAM DISULFIDE                                                         | CCN(CC)C(=S)SSC(=S)N(CC)CC                                         | 10 | 90.0 | 0.2  |  |  | 92.6  | 9.9  |  |  | 76.2  | 23.2 |  |  | 87.8  | 9.0  |  |  |
| L-GLUTAMIC ACID, N-[4-[[[2,4-DIAMINO-6-PTERIDINYL)METHYL]METHYLAMINO]BENZOYL]-[CAS] | CN(Cc1cnc2nc(N)nc(N)c2n1)c3c cc(cc3)C(=O)N[C@@H](CCC(=O)O)C(=O)O.O | 11 | 82.5 | 3.5  |  |  | 82.3  | 11.9 |  |  | 74.4  | 26.2 |  |  | 64.5  | 17.1 |  |  |
| OXIRANECARBOXYLIC ACID, 2-[6-(4-CHLOROPHENOXY)HEXYL]-, ETHYL ESTER- [CAS]           | CCOC(=O)C1(CCCCCO2ccc(Cl)cc2)CO1                                   | 2  | 86.3 | 0.8  |  |  | 84.0  | 13.3 |  |  | 72.8  | 14.8 |  |  | 102.3 | 4.6  |  |  |
|                                                                                     | CO/C(=C\1/C(C(=C(N)=C1C)C(=O)OC)c2ccccc2[N+](=O)[O-])/O            | 3  | 69.6 | 4.3  |  |  | 73.2  | 7.1  |  |  | 60.5  | 18.5 |  |  | 77.4  | 3.6  |  |  |
|                                                                                     | CC(=O)[C@H]1CC[C@H]2[C@@H]3CCC4=CC(=O)CC[C@]4(C)[C@H]3CC[C@]12C    | 4  | 41.4 | 19.1 |  |  | 96.8  | 28.9 |  |  | 61.4  | 25.2 |  |  | 42.8  | 0.2  |  |  |
| ZUCAPSAICIN                                                                         | COc1cc(CNC(=O)CCCC/C=C\C(C)C)ccc1O                                 | 5  | 53.5 | 0.6  |  |  | 27.9  | 8.2  |  |  | 65.0  | 1.0  |  |  | 47.7  | 1.0  |  |  |
| 3(2H)-PYRIDAZINONE, 6-[4-(DIFLUOROMETHOXY)-3-METHOXYPHENYL]-[CAS]                   | COc1cc(ccc1OC(F)F)c2ccc(O)nn2                                      | 6  | 91.6 | 7.9  |  |  | 122.0 | 8.4  |  |  | 103.6 | 3.1  |  |  | 80.3  | 3.1  |  |  |
| NORNICOTINE                                                                         | C1CNC(C1)c2cccnc2                                                  | 7  | 99.3 | 3.8  |  |  | 101   | 101  |  |  | 97.8  | 8.9  |  |  | 113.3 | 0.9  |  |  |
| URAPIDIL HYDROCHLORIDE                                                              | COc1cccc1N2CCN(CCCNc3cc(=O)n(C)c(=O)n3C)CC2.Cl                     | 8  | 33.5 | 0.5  |  |  | 41.9  | 11.5 |  |  | 52.0  | 7.1  |  |  | 44.8  | 3.6  |  |  |
| MAPROTIline HYDROCHLORIDE                                                           | CNCCCC1(CCC2c3ccccc31)c4ccc cc24.Cl                                | 9  | 67.2 | 7.2  |  |  | 100.1 | 35.5 |  |  | 72.1  | 6.9  |  |  | 3.4   | 16.1 |  |  |
| PIRIBEDIL                                                                           | C(N1CCN(CC1)c2ncccn2)c3ccc4 OCOc4c3.O.Cl                           | 10 | 59.1 | 14.6 |  |  | 105.3 | 6.3  |  |  | 70.7  | 4.0  |  |  | 52.3  | 8.0  |  |  |
| TFMPP                                                                               | FC(F)(F)c1cccc(c1)N2CCNCC2.Cl                                      | 11 | 85.4 | 10.0 |  |  | 100.9 | 26.2 |  |  | 72.7  | 8.3  |  |  | 62.7  | 16.8 |  |  |

**G**

|                          |                                                                         |   |      |     |      |     |       |      |      |     |      |      |      |     |       |      |      |     |
|--------------------------|-------------------------------------------------------------------------|---|------|-----|------|-----|-------|------|------|-----|------|------|------|-----|-------|------|------|-----|
| EPIGALLOCATECHIN GALLATE | Oc1cc(O)c2C[C@@H](OC(=O)c3cc(O)c(O)c(O)c3)[C@H](Oc2c1)c4cc(O)c(O)c(O)c4 | 2 | 70.3 | 5.9 |      |     | 71.1  | 0.6  |      |     | 69.5 | 21.7 |      |     | 124.3 | 22.8 |      |     |
| FLURBIPROFEN             | CC(C(=O)O)c1ccc(c(F)c1)c2ccc c2                                         | 3 | 72.3 | 4.2 |      |     | 68.3  | 4.2  |      |     | 55.6 | 14.5 |      |     | 79.1  | 4.3  |      |     |
| <b>FAMOTIDINE</b>        | NC(=N)Nc1nc(CSCCC(=N)NS(=O) )(=O)N)cs1                                  | 4 | 1.2  | 1.4 | 0.3  | 0.1 | 15.1  | 13.4 | 1.7  | 0.8 | 4.6  | 0.4  | 0.5  | 0.1 | 13.6  | 3.5  | 0.27 | 0.0 |
| SALBUTAMOL SULFATE       | CC(C)(C)NCC(O)c1ccc(O)c(CO)c1.O.S(=O)(=O)O                              | 5 | 85.8 | 2.5 |      |     | 120.1 | 16.9 |      |     | 90.7 | 14.1 |      |     | 134.5 | 6.4  |      |     |
| <b>PROCHLORPERAZINE</b>  | CN1CCN(CCCN2c3ccccc3Sc4ccc (Cl)cc24)CC1.O.C(=O)/C=C\C(=O)O              | 6 | 15.9 | 3.4 | 10.6 | 1.8 | 41.9  | 14.7 | 14.1 | 6.3 | 40.1 | 6.7  | 15.3 | 2.2 | 32.6  | 11.6 | 7.89 | 0.8 |

|   |                                                                                   |                                                                        |    |       |      |      |     |       |      |      |      |       |      |      |      |       |      |      |     |
|---|-----------------------------------------------------------------------------------|------------------------------------------------------------------------|----|-------|------|------|-----|-------|------|------|------|-------|------|------|------|-------|------|------|-----|
|   | BIFEMELANE                                                                        | CNCCCCOc1ccccc1Cc2ccccc2.Cl                                            | 7  | 67.5  | 4.8  |      |     | 91.4  | 16.0 |      |      | 71.7  | 5.7  |      |      | 42.9  | 15.3 |      |     |
|   | (-)-COTININE                                                                      | CN1[C@@H](CCC1=O)c2cccn2                                               | 8  | 96.5  | 5.5  |      |     | 111.0 | 31.2 |      |      | 94.2  | 17.2 |      |      | 94.8  | 47.7 |      |     |
|   | PIZOTYLIN                                                                         | CN1CCC(=C2c3ccsc3CCc4ccccc24)CC1.OC(=O)/C=C\C(=O)O                     | 9  | 56.9  | 0.9  |      |     | 46.1  | 3.0  |      |      | 55.7  | 15.8 |      |      | 54.2  | 9.5  |      |     |
|   |                                                                                   | CC(=O)N1CCN(CC1)c2ccc(OC[C@@H]3CO[C@@](Cn4ccnc4)(O3)c5ccc(Cl)cc5Cl)cc2 | 10 | 8.1   | 11.4 |      |     | 42.7  | 67.7 |      |      | 21.9  | 4.8  |      |      | -19.2 | 41.5 |      |     |
|   | PRAMIPEXOLE                                                                       | CCCN[C@@H]1CCc2nc(N)sc2C1                                              | 11 | 51.0  | 5.3  |      |     | 64.4  | 41.9 |      |      | 61.6  | 18.0 |      |      | 85.2  | 36.2 |      |     |
| H | RACLOPRIDE                                                                        | CCN1CCC[C@@H]1CNC(=O)c2c(O)c(Cl)cc(Cl)c2OC                             | 2  | 75.6  | 5.8  |      |     | 53.8  | 8.6  |      |      | 75.2  | 5.9  |      |      | 106.4 | 20.9 |      |     |
|   | 3-HYDROXY-1,2-DIMETHYL-4(1H)-PYRIDONE                                             | Cc1c(O)c(=O)ccn1C                                                      | 3  | 103.7 | 0.9  |      |     | 111.8 | 40.0 |      |      | 108.5 | 7.9  |      |      | 141.2 | 27.6 |      |     |
|   | SR 57227A                                                                         | NC1CCN(CC1)c2cccc(Cl)n2.Cl                                             | 4  | 80.7  | 12.7 |      |     | 110.0 | 15.8 |      |      | 82.0  | 7.6  |      |      | 41.5  | 32.5 |      |     |
|   | <b>(+/-)-VESAMICOL HYDROCHLORIDE</b>                                              | O[C@@H]1CCCC[C@@H]1N2CCC(CC2)c3ccccc3.Cl                               | 5  | 66.5  | 3.1  | 49.8 | 8.9 | 92.2  | 3.0  | 74.6 | 20.0 | 86.5  | 7.2  | 83.8 | 23.0 | 121.5 | 6.8  | 39.3 | 7.0 |
|   | 1H-CYCLOPENTA[B]QUINOLIN-9-AMINE, 2,3,5,6,7,8-HEXAHYDRO-, MONOHYDROCHLORIDE-[CAS] | Nc1c2CCCc2nc3CCCCc13                                                   | 6  | 8.7   | 4.0  |      |     | 43.4  | 31.8 |      |      | 16.9  | 1.6  |      |      | 26.7  | 5.6  |      |     |
|   | CGS 15943                                                                         | Nc1nc2ccc(Cl)cc2c3nc(nnn3)c4ccco4                                      | 7  | 97.4  | 13.1 |      |     | 110.7 | 4.9  |      |      | 105.1 | 4.3  |      |      | 75.8  | 27.9 |      |     |
|   | D-CYCLOSERINE                                                                     | N[C@@H]1CONC1=O                                                        | 8  | 97.2  | 9.9  |      |     | 104.3 | 16.9 |      |      | 108.6 | 3.3  |      |      | 135.7 | 1.0  |      |     |
|   | BETA-ESTRADIOL                                                                    | C[C@@]12CC[C@@H]3[C@@H](CCc4cc(O)ccc34)[C@@H]2CC[C@@H]1O               | 9  | 94.6  | 9.8  |      |     | 102.4 | 21.1 |      |      | 105.4 | 7.3  |      |      | 124.2 | 38.4 |      |     |
|   |                                                                                   | CN(C)CCN(Cc1ccccc1)c2cccn2.Cl                                          | 10 | 48.4  | 2.9  |      |     | 57.8  | 6.0  |      |      | 53.8  | 0.5  |      |      | 114.2 | 69.5 |      |     |
|   |                                                                                   | CCN(CC)CC(=O)Nc1c(C)cccc1C                                             | 11 | 106.9 | 2.9  |      |     | 107.7 | 14.8 |      |      | 121.4 | 2.1  |      |      | 129.7 | 15.5 |      |     |
|   |                                                                                   |                                                                        |    |       |      |      |     |       |      |      |      |       |      |      |      |       |      |      |     |
|   | <b>TRIMETHOPRIM</b>                                                               | O[C@@H]1CCCC[C@@H]1N2CCC(CC2)c3ccccc3.Cl                               |    |       |      | 1.4  | 0.1 |       |      | 1.5  | 0.2  |       |      | 1.61 | 0.1  |       |      | 0.75 | 0.1 |
